# Supplementary material for: Broad geographic sampling reveals predictable, pervasive, and strong seasonal adaptation in Drosophila
Source: bioRxiv preprint, doi:10.1101/337543, version 4 (2021-02-15)
Supplement: Supplemental Tables 1 and 2 [file 337543_file03.xlsx]

## Sheet: TableS1
Sample	Population	Locality	Locality_code	InternalName	Season	City	State	Country	Latitude	Longitude	Collection_date	Day	Month	Year	Individuals	Sex	Inbred	collector	Publication	Analyzed	Clinal	Core20	dp_mean_auto	dp_mean_x	SRA
PA_li_11_spring	PA_li_11	PA_li	PA	melPA_72011_SPT	spring	Linvilla	Pennsylvania	USA	39.88	-75.41	2011-07-15	NA	7	2011	75	male	FALSE	P. Schmidt lab	Bergland et al 2014	yes	yes	yes	65.78	35.72	SRX661841
PA_li_11_fall	PA_li_11	PA_li	PA	melPA_102011_FAT	fall	Linvilla	Pennsylvania	USA	39.88	-75.41	2011-10-15	NA	10	2011	47	male	FALSE	P. Schmidt lab	Bergland et al 2014	yes	no	yes	87.98	45.93	SRX661842
PA_li_10_fall	PA_li_10	PA_li	PA	melPA_112010_FAT	fall	Linvilla	Pennsylvania	USA	39.88	-75.41	2010-11-15	NA	11	2010	33	male	FALSE	P. Schmidt lab	Bergland et al 2014	yes	no	yes	88.28	45.56	SRX661840
PA_li_10_spring	PA_li_10	PA_li	PA	melPA_72010_SPT	spring	Linvilla	Pennsylvania	USA	39.88	-75.41	2010-07-15	NA	7	2010	116	male	FALSE	P. Schmidt lab	Bergland et al 2014	yes	no	yes	44.61	26.9	SRX661839
CA_es_12_spring	CA_es_12	CA_es	rd	mel137_062012_RD	spring	Esparto	California	USA	38.68	-122.046	2012-06-13	13	6	2012	27	male	FALSE	H. Machado	Machado, Bergland et al 2021	yes	no	yes	68.19	33.06	SRS1577356
UA_od_13_fall	UA_od_13	UA_od	OUK	mel13OUK10_FAT	fall	Odessa	NA	Ukraine	46.49	30.71	NA	NA	10	2013	61	male	FALSE	I. Kozeretska	Machado, Bergland et al 2021	yes	no	yes	83.91	41.79	SRS1577367
UA_od_13_spring	UA_od_13	UA_od	OUK	mel13OUK5_SPT	spring	Odessa	NA	Ukraine	46.49	30.71	NA	NA	5	2013	37	male	FALSE	I. Kozeretska	Machado, Bergland et al 2021	yes	no	yes	84.42	41.49	SRS1577369
CA_es_12_fall	CA_es_12	CA_es	rd	mel142_082012_RD	fall	Esparto	California	USA	38.68	-122.046	2012-08-22	22	8	2012	92	male	FALSE	H. Machado	Machado, Bergland et al 2021	yes	no	yes	58.69	29.5	SRS1577357
GA_at_14_fall	GA_at_14	GA_at	AGA	mel14AGA10_FAT	fall	Athens	Georgia	USA	33.95	-83.36	NA	NA	10	2014	99	male	FALSE	K .Dyer	Machado, Bergland et al 2021	yes	no	yes	155.34	71.82	SRS1577370
GA_at_14_spring	GA_at_14	GA_at	AGA	mel14AGA6_SPT	spring	Athens	Georgia	USA	33.95	-83.36	2014-06-15	15-20	6	2014	44	male	FALSE	K .Dyer	Machado, Bergland et al 2021	yes	no	yes	89.21	39.7	SRS1577371
MI_bh_14_fall	MI_bh_14	MI_bh	BHM	mel14BHM11_FAT	fall	Benton Harbor	Michigan	USA	42.1111	-86.4483	2014-11-05	5	11	2014	34	male	FALSE	T. Karasov et al	Machado, Bergland et al 2021	yes	no	yes	203.18	94.87	SRS1577372
MI_bh_14_spring	MI_bh_14	MI_bh	BHM	mel14BHM7_SPT	spring	Benton Harbor	Michigan	USA	42.1111	-86.4483	2014-07-26	26	7	2014	106	male	FALSE	T. Karasov et al	Machado, Bergland et al 2021	yes	no	yes	127.24	58.96	SRS1577373
VA_ch_14_fall	VA_ch_14	VA_ch	CUA	mel14CUA10_FAT	fall	Charlotttesville	Virginia	USA	38	-78.47	2014-10-14	14	10	2014	76	male	FALSE	P. Schmidt lab	Machado, Bergland et al 2021	yes	no	yes	95.74	46.76	SRS1577390
VA_ch_14_spring	VA_ch_14	VA_ch	CUA	mel14CUA6_SPT	spring	Charlotttesville	Virginia	USA	38	-78.47	2014-06-25	25	6	2014	104	male	FALSE	P. Schmidt lab	Machado, Bergland et al 2021	yes	no	yes	102.04	51.94	SRS1577391
WI_cp_14_spring	WI_cp_14	WI_cp	CWI	mel14CWI6_SPT	spring	Cross Plains	Wisconsin	USA	43.11	-89.65	2014-06-25	25	6	2014	130	male	FALSE	J. Pool	Machado, Bergland et al 2021	yes	no	yes	108.42	52.06	SRS1577392
WI_cp_14_fall	WI_cp_14	WI_cp	CWI	mel14CWI9_FAT	fall	Cross Plains	Wisconsin	USA	43.11	-89.65	2014-09-18	18	9	2014	61	male	FALSE	J. Pool	Machado, Bergland et al 2021	yes	no	yes	144.31	70.51	SRS1577393
MA_la_14_fall	MA_la_14	MA_la	LMA	mel14LMA10_FAT	fall	Lancaster	Massachusetts	USA	42.45	-71.67	2014-10-20	20	10	2014	90	male	FALSE	P. Schmidt lab	Machado, Bergland et al 2021	yes	no	yes	118.64	57.39	SRS1577394
MA_la_14_spring	MA_la_14	MA_la	LMA	mel14LMA7_SPT	spring	Lancaster	Massachusetts	USA	42.45	-71.67	2014-07-20	20	7	2014	32	male	FALSE	P. Schmidt lab	Machado, Bergland et al 2021	yes	no	yes	98.67	48.52	SRS1577396
PA_sc_14_fall	PA_sc_14	PA_sc	SCPA	mel14SCPA10_FAT	fall	State College	Pennsylvania	USA	40.7934	-77.86	2014-10-16	16	10	2014	67	male	FALSE	S. Schaeffer	Machado, Bergland et al 2021	yes	no	yes	104.29	49.29	SRS1577397
PA_sc_14_spring	PA_sc_14	PA_sc	SCPA	mel14SCPA6_SPT	spring	State College	Pennsylvania	USA	40.7934	-77.86	2014-06-18	18-24	6	2014	45	male	FALSE	S. Schaeffer	Machado, Bergland et al 2021	yes	no	yes	116.55	55.02	SRS1577398
KA_to_14_fall	KA_to_14	KA_to	TKA	mel14TKA10_FAT	fall	Topeka	Kansas	USA	39	-96	2014-10-22	22	10	2014	48	male	FALSE	P.Roy	Machado, Bergland et al 2021	yes	no	yes	65.86	32.48	SRS1577399
KA_to_14_spring	KA_to_14	KA_to	TKA	mel14TKA6_SPT	spring	Topeka	Kansas	USA	39	-96	2014-06-22	22	6	2014	72	male	FALSE	P.Roy	Machado, Bergland et al 2021	yes	no	yes	76.68	36.48	SRS1577400
VA_ch_15_fall	VA_ch_15	VA_ch	CUA	mel15CUA10_FAT	fall	Charlotttesville	Virginia	USA	38	-78.47	2015-10-19	19	10	2015	89	male	FALSE	A. Bergland	Machado, Bergland et al 2021	yes	no	yes	98.39	49.46	SRS1577401
VA_ch_15_spring	VA_ch_15	VA_ch	CUA	mel15CUA7_SPT	spring	Charlotttesville	Virginia	USA	38	-78.47	2015-07-01	1	7	2015	65	male	FALSE	A. Bergland	Machado, Bergland et al 2021	yes	no	yes	104.38	49.47	SRS1577402
ON_su_15_spring	ON_su_15	ON_su	SON	mel15SON8_SPT	spring	Sudbury	Ontario	Canada	46.53	-80.96	2015-08-03	3	8	2015	108	male	FALSE	T. Merrit	Machado, Bergland et al 2021	yes	no	yes	214.91	119.07	SRS1577405
ON_su_15_fall	ON_su_15	ON_su	SON	mel15SON9_FAT	fall	Sudbury	Ontario	Canada	46.53	-80.96	2015-09-30	30	9	2015	110	male	FALSE	T. Merrit	Machado, Bergland et al 2021	yes	no	yes	86.23	41.75	SRS1577406
CA_es_13_spring	CA_es_13	CA_es	rd	mel169_052013_RD	spring	Esparto	California	USA	38.68	-122.046	2013-05-07	7	5	2013	50	male	FALSE	H. Machado	Machado, Bergland et al 2021	yes	no	yes	64.62	32.48	SRS1577418
CA_tu_13_spring	CA_tu_13	CA_tu	co	mel171_052013_CO	spring	Tuolumne	California	USA	37.97	-120.26	2013-05-14	14	5	2013	98	male	FALSE	H. Machado	Machado, Bergland et al 2021	yes	no	yes	63.03	31.04	SRS1577359
CA_tu_13_fall	CA_tu_13	CA_tu	co	mel176_082013_CO	fall	Tuolumne	California	USA	37.97	-120.26	2013-08-31	31	8	2013	100	male	FALSE	H. Machado	Machado, Bergland et al 2021	yes	no	yes	91.89	48.97	SRS1577360
CA_es_13_fall	CA_es_13	CA_es	rd	mel178_092013_RD	fall	Esparto	California	USA	38.68	-122.046	2013-09-01	1	9	2013	57	male	FALSE	H. Machado	Machado, Bergland et al 2021	yes	no	yes	71.81	35.76	SRS1577364
ES_ba_12_spring	ES_ba_12	ES_ba	BA	melBA_072012_SPT	spring	Barcelona	NA	Spain	41.38	2.17	2012-07-13	13	7	2012	55	male	FALSE	J. Gonzalez	Machado, Bergland et al 2021	yes	no	yes	34.91	17.42	SRS1468202
ES_ba_12_fall	ES_ba_12	ES_ba	BA	melBA_102012_FAT	fall	Barcelona	NA	Spain	41.38	2.17	2012-10-15	NA	10	2012	29	male	FALSE	J. Gonzalez	Machado, Bergland et al 2021	yes	no	yes	51.74	25.47	SRS1468204
MA_la_12_spring	MA_la_12	MA_la	MA	melMA_072012_SPT	spring	Lancaster	Massacusetts	USA	42.45	-71.67	2012-07-28	28	7	2012	100	male	FALSE	P. Schmidt	Machado, Bergland et al 2021	yes	no	yes	62.15	34	SRS1468210
MA_la_12_fall	MA_la_12	MA_la	MA	melMA_102012_FAT	fall	Lancaster	Massacusetts	USA	42.45	-71.67	2012-10-02	2	10	2012	63	male	FALSE	P. Schmidt lab	Machado, Bergland et al 2021	yes	no	yes	52	26.92	SRS1468209
NY_it_12_spring	NY_it_12	NY_it	NY	melNY_072012_SPT	spring	Ithaca	New York	USA	42.44	-76.5	2012-07-25	25	7	2012	30	male	FALSE	Howick/Lazzaro	Machado, Bergland et al 2021	yes	no	yes	75.25	36.7	SRS1468213
NY_it_12_fall	NY_it_12	NY_it	NY	melNY_102012_FAT	fall	Ithaca	New York	USA	42.44	-76.5	2012-09-23	23	9	2012	58	male	FALSE	Howick/Lazzaro	Machado, Bergland et al 2021	yes	no	yes	39.53	20.47	SRS1468211
AT_gr_12_spring	AT_gr_12	AT_gr	VI	melVI_082012_SPT	spring	Gross-Enzersdorf	NA	Austria	48.2	16.37	2012-08-03	3	8	2012	62	male	FALSE	Fabian/Flatt	Machado, Bergland et al 2021	yes	no	yes	34.83	17.63	SRS1468206
AT_gr_12_fall	AT_gr_12	AT_gr	VI	melVI_102012_FAT	fall	Gross-Enzersdorf	NA	Austria	48.2	16.37	2012-10-20	20	10	2012	44	male	FALSE	Fabian/Flatt	Machado, Bergland et al 2021	yes	no	yes	79.87	38.79	SRS1468205
WI_cp_12_spring	WI_cp_12	WI_cp	WI	melWI_062012_SPT	spring	Cross Plains	Wisconsin	USA	43.11	-89.65	2012-06-10	10	6	2012	83	male	FALSE	J. Pool	Machado, Bergland et al 2021	yes	no	yes	22.35	13.57	SRS1468208
WI_cp_12_fall	WI_cp_12	WI_cp	WI	melWI_102012_FAT	fall	Cross Plains	Wisconsin	USA	43.11	-89.65	2012-09-11	11	9	2012	164	male	FALSE	J. Pool	Machado, Bergland et al 2021	yes	no	yes	54.12	26.63	SRS1468216
FL_ho_10_spring	FL_ho_10	FL_ho	FL	melFL_072010_SPT	spring	Homestead	Florida	USA	25.5	-80.477	2010-07-15	NA	7	20102008	39	male	FALSE	P. Schmidt, A. Bergland	Bergland et al 2014	yes	yes	no	72.82	38.89	SRX661832
GA_ha_08_spring	GA_ha_08	GA_ha	GA	melGA_072008_SPT	spring	Hahia	Georgia	USA	30.99	-83.37	2008-07-15	NA	7	2008	51	male	FALSE	P. Schmidt	Bergland et al 2014	yes	yes	no	117.62	60.4	SRX661834
SC_eu_10_spring	SC_eu_10	SC_eu	SC	melSC_072010_SPT	spring	Eutawville	South Carolina	USA	33.39	-80.34	2010-07-15	NA	7	20102008	48	male	FALSE	P. Schmidt lab	Machado, Bergland et al 2021	yes	yes	no	101.18	51.87	SRX661835
PA_li_09_spring	PA_li_09	PA_li	PA	melPA_072009_SPT	spring	Linvilla	Pennsylvania	USA	39.88	-75.41	2009-07-15	NA	7	2009	55	male	FALSE	P. Schmidt lab	Bergland et al 2014	no	no	no	220.34	156.02	SRX661837
PA_li_12_spring	PA_li_12	PA_li	PA	melPA_072012_SPT	spring	Linvilla	Pennsylvania	USA	39.88	-75.41	2012-07-16	16	7	2012	115	male	FALSE	P. Schmidt lab	Bergland et al 2014	no	no	no	72.96	39.31	SRS1468215
PA_li_12_fall	PA_li_12	PA_li	PA	melPA_092012_SUM	fall	Linvilla	Pennsylvania	USA	39.88	-75.41	2012-09-13	13	9	2012	50	male	FALSE	P. Schmidt lab	Bergland et al 2014	no	no	no	57.29	55.8	SRS1468217
PA_li_09_fall	PA_li_09	PA_li	PA	melPA_112009_FAT	fall	Linvilla	Pennsylvania	USA	39.88	-75.41	2009-11-15	NA	11	2009	74	male	FALSE	P. Schmidt lab	Bergland et al 2014	no	no	no	71.26	33.12	SRX661838
WI_cp_13_spring	WI_cp_13	WI_cp	WI	mel13CWI7_SPT	spring	Cross Plains	Wisconsin	USA	43.11	-89.65	2013-07-02	2	7	2013	130	male	FALSE	J. Pool	Machado, Bergland et al 2021	no	no	no	190.92	92.25	SRS1577365
WI_cp_13_fall	WI_cp_13	WI_cp	WI	mel13CWI9_FAT	fall	Cross Plains	Wisconsin	USA	43.11	-89.65	2013-09-22	22	9	2013	61	male	FALSE	J. Pool	Machado, Bergland et al 2021	no	no	no	80.2	38.88	SRS1577366
PA_li_14_fall	PA_li_14	PA_li	PA	mel14LNPA10_FAT	fall	Linvilla	Pennsylvania	USA	39.88	-75.41	2014-10-17	17	10	2014	50	male	FALSE	P. Schmidt lab	Machado, Bergland et al 2021	no	no	no	133.13	65.03	SRS1577409
PA_li_14_spring	PA_li_14	PA_li	PA	mel14LNPA6_SPT	spring	Linvilla	Pennsylvania	USA	39.88	-75.41	2014-06-27	27	6	2014	92	male	FALSE	P. Schmidt lab	Machado, Bergland et al 2021	no	no	no	75	37.93	SRS1577411
PA_li_15_fall	PA_li_15	PA_li	PA	mel15LN10_FAT	fall	Linvilla	Pennsylvania	USA	39.88	-75.41	NA	NA	10	2015	52	male	FALSE	P. Schmidt lab	Machado, Bergland et al 2021	no	no	no	106.83	50.88	SRS1577412
PA_li_15_spring	PA_li_15	PA_li	PA	mel15LN7_SPT	spring	Linvilla	Pennsylvania	USA	39.88	-75.41	NA	NA	7	2015	74	male	FALSE	P. Schmidt lab	Machado, Bergland et al 2021	no	no	no	212.41	118.69	SRS1577413
PA_li_11_frost	PA_li_11	PA_li	PA	melPA_112011_WIN_FRT	frost	Linvilla	Pennsylvania	USA	39.88	-75.41	2011-11-15	NA	11	2011	50	male	FALSE	P. Schmidt lab	Bergland et al 2014	no	no	no	65.24	33.03	SRX661843
PA_li_13_spring	PA_li_13	PA_li	PA	mel13LN6_SPT	spring	Linvilla	Pennsylvania	USA	39.88	-75.41	NA	NA	6	2013	54	male	FALSE	P. Schmidt lab	Machado, Bergland et al 2021	no	no	no	101.99	48.48	SRS1577410
CA_pl_12_fall	CA_pl_12	CA_pl	gb	mel144_082012_GB	fall	Placerville	California	USA	38.74	-120.74	2012-08-25	25	8	2012	100	male	FALSE	H. Machado	Machado, Bergland et al 2021	no	no	no	118.11	58.96	SRS1577368
CA_st_12_fall	CA_st_12	CA_st	fb	mel153_102012_FB	fall	Stockton	California	USA	38.02	-121.2	2012-10-01	1	10	2012	100	male	FALSE	H. Machado	Machado, Bergland et al 2021	no	no	no	50.68	25.25	SRS1577395
CA_tu_12_fall	CA_tu_12	CA_tu	co	mel156_102012_CO	fall	Tuolumne	California	USA	37.97	-120.26	2012-10-10	10	10	2012	116	male	FALSE	H. Machado	Machado, Bergland et al 2021	no	no	no	50.83	26.14	SRS1577407
CA_st_12_frost	CA_st_12	CA_st	fb	mel158_112012_FB	frost	Stockton	California	USA	38.02	-121.2	2012-11-15	15	11	2012	58	male	FALSE	H. Machado	Machado, Bergland et al 2021	no	no	no	52.21	25.27	SRS1577414
CA_tu_12_frost	CA_tu_12	CA_tu	co	mel159_112012_CO	frost	Tuolumne	California	USA	37.97	-120.26	2012-11-17	17	11	2012	60	male	FALSE	H. Machado	Machado, Bergland et al 2021	no	no	no	91.86	44.19	SRS1577415
PA_sc_15_spring	PA_sc_15	PA_sc	SCPA	mel15SCPA7_SPT	spring	State College	Pennsylvania	USA	40.7934	-77.86	2015-07-18	18-24	7	2015	47	male	FALSE	S. Schaeffer	Machado, Bergland et al 2021	no	no	no	95.87	46.13	SRS1577403
IL_ur_15_spring	IL_ur_15	IL_ur	UIL	mel15UIL7_SPT	spring	Urbana	Illinois	USA	40.11	-88.21	2015-07-11	11	7	2015	184	male	FALSE	J. Birdsley	Machado, Bergland et al 2021	no	no	no	97.07	47.39	SRS1577408
CA_pl_12_frost	CA_pl_12	CA_pl	gb	mel160_112012_GB	frost	Placerville	California	USA	38.74	-120.74	2012-11-18	18	11	2012	56	male	FALSE	H. Machado	Machado, Bergland et al 2021	no	no	no	57.94	27.89	SRS1577416
CA_es_12_frost	CA_es_12	CA_es	rd	mel161_112012_RD	frost	Esparto	California	USA	38.68	-122.046	2012-11-20	20	11	2012	92	male	FALSE	H. Machado	Machado, Bergland et al 2021	no	no	no	56.2	27.14	SRS1577417
CA_pl_13_fall	CA_pl_13	CA_pl	gb	mel175_082013_GB	fall	Placerville	California	USA	38.74	-120.74	2013-08-30	30	8	2013	88	male	FALSE	H. Machado	Machado, Bergland et al 2021	no	no	no	71.49	36.65	SRS1577358
CA_st_13_fall	CA_st_13	CA_st	fb	mel177_092013_FB	fall	Stockton	California	USA	38.02	-121.2	2013-09-03	3	9	2013	72	male	FALSE	H. Machado	Machado, Bergland et al 2021	no	no	no	73.91	36.92	SRS1577361
CA_tu_13_frost	CA_tu_13	CA_tu	co	mel180_122013_CO	frost	Tuolumne	California	USA	37.97	-120.26	2013-12-08	8	12	2013	100	male	FALSE	H. Machado	Machado, Bergland et al 2021	no	no	no	56.3	27.33	SRS1577362
CA_pl_13_frost	CA_pl_13	CA_pl	gb	mel181_122013_GB	frost	Placerville	California	USA	38.74	-120.74	2013-12-16	16	12	2013	72	male	FALSE	H. Machado	Machado, Bergland et al 2021	no	no	no	62.82	31	SRS1577363
ME_bo_09_fall	ME_bo_09	ME_bo	ME	melME_102009_FAT	fall	Bowdoin	Maine	USA	44	-69.96	2009-10-15	NA	10	2009	161	male	FALSE	P. Schmidt lab	Machado, Bergland et al 2021	no	no	no	126.86	66.68	SRX661844,SRX661845
VA_ch_12_spring	VA_ch_12	VA_ch	VA	melVA_072012_SPT	spring	Charlottesville	Virginia	USA	38	-78.47	2012-07-18	18	7	2012	95	male	FALSE	P. Schmidt	Machado, Bergland et al 2021	no	no	no	82.37	44.18	SRS1468212
WI_cp_12_frost	WI_cp_12	WI_cp	WI	melWI_102012_FAT_FRT	frost	Cross Plains	Wisconsin	USA	43.11	-89.65	2012-10-20	20	10	2012	100	male	FALSE	J. Pool	Machado, Bergland et al 2021	no	no	no	52.09	25.13	SRS1468207
WA_se_14_spring	WA_se_14	WA_se	TWA	mel14TWA7_SPT	spring	Seattle	Washington	USA	47.61	-122.33	2014-07-15	NA	7	2014	70	male	FALSE		Machado, Bergland et al 2021	no	no	no	81.87	40.4	SRX4891300
NC_ra_03_n	NC_ra_03	NC_ra	NC	melNC_2003	n	Raleigh	North Carolina	USA	35.77	-78.63	NA	NA	NA	2003	92	male	TRUE	Mackay	Mackay et al 2012	no	no	no	38.18	19.84	SRX661836

## Sheet: TableS2
chrom	pos	ref	alt	seas.glm.beta	seas.glm.p
2L	10002721	G	C	0.411934	0.00365023
2L	10006427	T	C	0.367082	0.0028686
2L	10014504	T	A	0.327929	0.00236496
2L	10027781	T	G	-0.424915	0.00049741
2L	10029666	G	A	0.421652	0.000583357
2L	10029671	C	A	0.435297	0.000432824
2L	10029676	T	A	0.450915	0.00012373
2L	10035637	C	T	0.30614	0.00301264
2L	10041622	G	C	-0.314354	0.00343951
2L	10042555	T	A	-0.410168	0.000235903
2L	10047135	A	G	-0.288729	0.00252611
2L	10052358	C	T	-0.321694	0.0018994
2L	10052360	A	C	-0.34002	0.00103284
2L	10052365	C	T	-0.343071	0.000727424
2L	10052458	G	A	-0.365747	0.00212129
2L	10060881	C	T	-0.305931	0.0014418
2L	10069361	C	T	0.357596	0.00215705
2L	10079624	G	T	-0.451106	0.000938304
2L	10080841	T	A	0.309569	0.00160515
2L	10080856	C	T	0.305279	0.00260247
2L	10095103	T	A	-0.349709	0.00284846
2L	10096427	T	C	-0.329121	0.00332105
2L	10099846	C	T	0.408203	0.000532223
2L	10102406	T	A	-0.279963	0.001807
2L	10103650	C	T	0.397388	0.00192818
2L	10115868	C	T	0.434929	1.4394e-05
2L	10122101	C	A	-0.391623	0.00156664
2L	10125523	C	A	-0.318011	0.00213099
2L	10129355	A	G	-0.276522	0.00376525
2L	10151359	C	A	0.367778	0.000371155
2L	10151400	G	A	0.318993	0.00264413
2L	10152408	T	A	0.353747	0.00385562
2L	10152582	T	C	0.335682	0.00152558
2L	10152750	G	A	0.385665	0.0004162
2L	10152765	T	G	0.319928	0.00310676
2L	10167348	G	C	0.400417	0.000304196
2L	10178032	T	C	-0.352981	0.000351458
2L	10178047	A	T	-0.305513	0.0011638
2L	1018419	T	G	-0.339121	0.000431162
2L	1018421	T	G	-0.32974	0.000613208
2L	10187283	C	T	-0.470008	0.000131162
2L	1019004	G	T	-0.300954	0.00314632
2L	1021155	T	C	-0.38716	0.000105697
2L	10235107	A	G	-0.362331	0.00372124
2L	1024487	A	G	0.341467	0.000415687
2L	1025009	G	T	0.279377	0.00313152
2L	1025391	G	C	0.299655	0.00171474
2L	10270865	G	C	-0.475307	0.00378221
2L	10291057	A	G	0.41391	0.00172588
2L	10305120	A	G	0.271364	0.00302158
2L	10307135	C	T	0.348187	0.00112431
2L	10310879	T	C	0.284587	0.00309467
2L	10311969	C	T	0.334428	0.00142473
2L	10321611	T	A	0.290742	0.0024888
2L	10368439	T	C	-0.339851	0.000205284
2L	1037119	T	C	-0.356145	0.00159698
2L	1037125	C	A	-0.352692	0.00265502
2L	1037141	T	G	-0.374184	0.00102786
2L	10373648	T	C	-0.284534	0.0035031
2L	10379921	T	C	-0.27731	0.00290701
2L	10387541	A	T	-0.418431	0.000448258
2L	10387643	A	G	-0.364114	0.000868885
2L	1044729	G	C	0.380416	0.00234031
2L	10447821	A	G	0.358093	0.000620646
2L	10451425	G	T	-0.264209	0.00387772
2L	10459970	T	C	0.306389	0.00309353
2L	1046306	C	A	0.372674	0.00096887
2L	10475142	G	T	0.33291	0.000559644
2L	10475147	A	G	0.303566	0.00150861
2L	10475148	T	A	0.321172	0.000800596
2L	10478716	T	C	-0.275621	0.00352119
2L	1048502	C	T	0.374729	0.00279219
2L	10493719	C	G	0.311188	0.00340462
2L	1049808	T	A	0.312155	0.00322756
2L	10500656	A	C	-0.301292	0.00193424
2L	10500663	C	T	-0.300929	0.00199622
2L	10501738	A	T	-0.264535	0.00376698
2L	10503378	T	C	0.299113	0.00218246
2L	10515762	G	T	-0.370486	0.00239378
2L	10522003	A	G	-0.326204	0.00171439
2L	1052998	C	A	-0.364827	0.00250696
2L	10532511	A	G	-0.281905	0.00357194
2L	10534629	T	A	-0.328351	0.00116597
2L	10534637	A	C	-0.291182	0.00358749
2L	10534751	C	T	0.348381	0.000370866
2L	10534753	G	A	0.307712	0.0013625
2L	10534772	C	T	0.310824	0.00218134
2L	10535145	G	T	0.384945	0.000448422
2L	10535146	A	T	0.388953	0.000362885
2L	10535290	C	T	-0.289501	0.0027707
2L	10537741	G	T	-0.294397	0.0021897
2L	10554835	G	A	0.333656	0.00282758
2L	10584098	T	A	-0.349875	0.00186706
2L	10590002	G	A	0.305022	0.00234416
2L	10590562	G	A	0.273057	0.00279113
2L	10591419	T	C	0.568798	0.000256202
2L	10656336	T	C	-0.316928	0.00113818
2L	10661686	A	C	-0.383071	0.000169849
2L	10667371	T	A	0.59496	0.000599123
2L	10698827	C	A	0.296335	0.00349421
2L	10699699	T	C	-0.389659	0.000846175
2L	10706234	A	G	-0.351536	0.00122441
2L	10708938	G	A	-0.415906	0.00018172
2L	10709011	C	T	-0.484103	0.000631868
2L	10713404	C	G	0.379472	9.12185e-05
2L	10716230	T	C	0.308308	0.0023117
2L	10717928	T	C	0.315334	0.00246663
2L	1072073	C	A	0.336193	0.00380761
2L	10722448	A	G	-0.295845	0.00326002
2L	10722449	A	C	-0.311051	0.0019232
2L	10722452	C	T	-0.295284	0.00331614
2L	10724292	A	G	-0.326174	0.00130113
2L	10725334	G	A	0.342622	0.0022428
2L	10730832	C	T	-0.352695	0.00155386
2L	10731433	C	T	0.483231	0.000358753
2L	10769506	C	A	0.390025	0.00188597
2L	10769640	T	A	-0.405504	0.000209602
2L	1078433	G	A	0.418209	0.00264438
2L	10799324	T	A	0.619647	0.00127672
2L	10803915	T	G	-0.379059	0.00172821
2L	10815306	T	G	0.370855	0.000244922
2L	10822055	G	A	0.288139	0.00287114
2L	10822088	C	G	0.27274	0.0038604
2L	10834403	A	T	-0.320697	0.0022868
2L	10840020	G	A	0.292876	0.00308664
2L	10853589	T	C	0.323547	0.00243699
2L	10854237	C	T	0.333081	0.00290563
2L	10868414	T	A	0.30915	0.00137458
2L	10868868	T	C	-0.34852	0.000508306
2L	10876241	G	A	-0.290503	0.00193489
2L	10884971	T	C	-0.31322	0.00374251
2L	10893787	A	G	-0.329409	0.00118383
2L	1089741	T	G	-0.365978	0.000339752
2L	1089742	G	A	-0.331813	0.00140729
2L	10905388	G	C	-0.365172	0.00333014
2L	10914033	G	C	0.321893	0.00256018
2L	10921812	C	T	-0.33576	0.00155829
2L	10922363	A	T	-0.308325	0.00273005
2L	10924672	G	C	-0.39188	0.000751562
2L	10924779	G	A	-0.303339	0.00076759
2L	10924822	A	G	-0.276733	0.00299877
2L	10924828	A	C	-0.352504	0.000239474
2L	10925178	A	G	-0.313029	0.00270297
2L	10946153	T	G	-0.285893	0.00315881
2L	10975533	T	G	0.411441	0.000659246
2L	10975539	A	T	0.443514	0.000295959
2L	1098008	G	A	-0.575646	3.65133e-08
2L	10987497	T	C	-0.314974	0.00211633
2L	1098791	C	T	0.357989	0.0028558
2L	10988089	A	G	-0.346226	0.00156757
2L	1099052	T	A	-0.335193	0.000459364
2L	11028944	A	T	0.494354	6.90131e-05
2L	11032076	G	C	0.265749	0.00344488
2L	11032116	G	C	0.274753	0.00342398
2L	11046674	A	C	-0.317349	0.00238571
2L	11047392	T	C	-0.356084	0.00121305
2L	11047644	A	G	-0.589131	0.000386626
2L	11055014	A	T	-0.311882	0.00309972
2L	11060169	C	A	-0.347726	0.00231028
2L	11060170	A	T	-0.34811	0.00224508
2L	11069523	G	A	-0.272488	0.00327259
2L	11072516	G	A	-0.317139	0.000775539
2L	11072526	A	G	-0.293068	0.00155334
2L	1107708	T	C	0.366906	0.000961628
2L	11077715	T	C	0.446952	0.000384957
2L	11081000	G	C	0.270004	0.00387158
2L	11089800	C	A	-0.335778	0.00113513
2L	11092228	A	T	-0.3225	0.00156112
2L	11096075	G	A	0.292977	0.00314239
2L	11099185	A	C	-0.330062	0.00329637
2L	11109159	T	C	-0.333125	0.00128316
2L	1110949	T	C	0.286144	0.00262876
2L	11110272	A	T	-0.307104	0.0010442
2L	11110280	T	G	-0.318209	0.000633975
2L	11110295	C	G	-0.283439	0.00243258
2L	11110298	A	T	-0.283642	0.00254343
2L	11112917	A	G	-0.390905	0.00016203
2L	11129171	T	C	-0.289796	0.00346168
2L	11129198	A	G	-0.391605	0.00011962
2L	11131633	T	C	-0.366256	0.000101859
2L	11131869	A	T	0.28891	0.00216501
2L	11135133	T	C	0.358304	0.00241945
2L	11160955	A	G	-0.2965	0.00131182
2L	11163408	A	T	-0.322742	0.0023057
2L	11163429	G	A	-0.33093	0.00275495
2L	11163433	G	A	-0.326925	0.00300675
2L	11163434	C	T	-0.318977	0.00382024
2L	11164799	A	C	-0.349221	0.000260271
2L	11169321	T	C	-0.302271	0.0016329
2L	11194673	C	T	0.53681	0.00019062
2L	11194674	C	T	0.486613	0.000709579
2L	11195342	T	C	0.505554	0.000567155
2L	11196896	A	G	-0.404632	0.00338763
2L	11208667	A	C	0.53005	0.000139302
2L	11213150	A	T	0.349465	0.000774285
2L	11213814	C	T	0.42283	0.000580926
2L	11213839	C	A	0.430462	0.000338448
2L	11226423	A	G	0.33177	0.00135946
2L	11226426	G	T	0.385183	0.000382211
2L	11226429	C	G	0.395205	0.000183383
2L	11228859	G	T	0.543991	4.08638e-05
2L	11240934	A	G	0.352509	0.00238853
2L	11242251	C	T	0.474792	0.000827918
2L	11265915	T	G	-0.284861	0.00366065
2L	11273800	C	T	0.38356	0.00123699
2L	11273821	C	A	0.404262	0.000844384
2L	11292906	T	C	-0.263124	0.00350366
2L	11293706	G	C	-0.27006	0.00331073
2L	11293737	A	C	-0.494038	0.00117417
2L	1135693	C	T	-0.328857	0.000879172
2L	11357095	T	G	0.336731	0.00285198
2L	11358104	C	T	0.334619	0.000873679
2L	11360301	T	G	0.321411	0.0017634
2L	11381782	G	A	0.329938	0.000642816
2L	11381801	G	T	0.385514	7.9497e-05
2L	11381809	A	G	0.338673	0.000509433
2L	11381872	C	T	0.336292	0.00137072
2L	11381879	A	T	0.312415	0.00306879
2L	11386908	G	A	0.348566	0.00221227
2L	11388858	C	T	0.374739	0.00274847
2L	11394257	T	C	0.294975	0.00199104
2L	11394385	C	A	0.276144	0.00340928
2L	11398624	G	C	-0.361941	0.000471883
2L	11399561	G	A	0.326316	0.00307729
2L	11405772	A	G	0.51326	0.00172376
2L	1141085	C	T	-0.372734	0.000500397
2L	11418027	C	T	0.357044	0.000333231
2L	1142145	G	A	-0.282327	0.00162873
2L	11448132	C	T	-0.305291	0.00157539
2L	11448134	C	T	-0.298343	0.00188074
2L	11448236	G	C	0.331491	0.00358212
2L	1148234	C	T	-0.322538	0.00229649
2L	11486618	T	C	-0.499524	0.00149065
2L	11492965	C	A	0.381108	0.00260355
2L	11498924	T	A	-0.32908	0.00104181
2L	11498989	T	C	-0.328621	0.00102575
2L	11498997	A	T	-0.33329	0.00115203
2L	11503825	G	A	-0.298077	0.00193952
2L	11503849	G	A	-0.279426	0.00306332
2L	11529954	T	G	0.308428	0.0025494
2L	1154723	C	T	0.583248	0.000175361
2L	1156545	G	A	-0.364785	0.00253374
2L	11587668	G	T	-0.355144	0.00133795
2L	11587714	A	G	-0.433192	0.000224779
2L	11588083	C	A	-0.315459	0.00334627
2L	11609081	A	G	0.506296	0.000174632
2L	11610065	T	C	-0.323629	0.00282349
2L	11610581	A	C	0.410836	0.00241725
2L	11610707	G	A	0.433487	0.0026371
2L	11643306	A	G	0.356567	0.00240298
2L	11643325	A	T	0.377113	0.00107354
2L	11643355	A	G	0.430068	0.000129804
2L	11654329	G	A	-0.308841	0.00186653
2L	11683609	G	A	0.320143	0.00228203
2L	11700881	T	G	0.298227	0.00361428
2L	11706851	A	T	0.340118	0.00124021
2L	11709142	A	G	-0.301079	0.00285612
2L	11709144	C	T	-0.294698	0.00323906
2L	11727680	A	G	-0.311348	0.0034354
2L	11756201	A	T	0.487426	0.00257454
2L	11770846	G	A	0.311696	0.0014907
2L	11781350	C	A	-0.360313	0.00142763
2L	11804317	G	A	-0.37996	6.22423e-05
2L	11812692	G	A	-0.363504	0.00252466
2L	11819980	A	C	-0.387696	0.00125592
2L	11821923	T	A	0.493734	4.40841e-05
2L	11829815	T	C	-0.277596	0.00203989
2L	11829826	T	A	-0.27375	0.00280493
2L	11829840	G	T	-0.303804	0.00102361
2L	11831468	A	T	-0.304012	0.00141756
2L	11832117	C	T	0.259362	0.0038377
2L	11840337	C	T	-0.268601	0.00216838
2L	11841277	G	A	-0.324781	0.0019744
2L	11848163	T	C	-0.302435	0.00193722
2L	11848622	G	C	-0.293218	0.00276301
2L	11858132	C	T	0.720265	3.26957e-05
2L	11866927	C	T	0.508857	0.00207122
2L	11867125	C	T	-0.37796	6.40569e-05
2L	1187142	C	G	0.397003	0.00280304
2L	1187176	G	T	0.363943	0.00271867
2L	11872847	A	G	-0.343174	0.000870141
2L	11875794	G	A	0.306111	0.00114129
2L	11878900	C	T	-0.334865	0.0018256
2L	11929305	C	A	0.327758	0.00126759
2L	11930210	C	T	0.479974	0.00300413
2L	11936016	C	G	-0.285001	0.00189202
2L	11950629	T	C	0.32466	0.00168182
2L	11957528	G	T	-0.470876	0.000515186
2L	11957531	T	C	-0.476643	0.000407677
2L	11980282	G	C	0.341527	0.000127014
2L	11980449	T	C	0.28733	0.00345952
2L	12009798	G	T	0.587339	0.000893502
2L	12024549	G	A	-0.271656	0.00272209
2L	12029225	A	T	0.341769	0.000295514
2L	12031560	C	G	0.278311	0.00322242
2L	12033234	A	G	-0.351876	0.00224801
2L	12033934	G	C	0.329817	0.000301315
2L	12040696	G	C	-0.33291	0.00248034
2L	12040697	T	G	-0.356735	0.00116544
2L	12040698	G	C	-0.369935	0.000740769
2L	12040699	T	C	-0.35534	0.00120781
2L	12050269	C	G	0.300449	0.00256131
2L	12060536	A	C	0.305772	0.00126689
2L	12060572	T	C	0.287582	0.0026416
2L	1207133	G	A	0.374387	0.000578329
2L	12078821	T	C	-0.366492	0.000374804
2L	12078890	A	G	-0.342152	0.00111468
2L	12078972	A	T	-0.362348	0.00162
2L	12089946	T	A	0.379491	0.00134945
2L	12097729	G	T	0.413997	0.000342789
2L	12097806	A	C	0.357481	0.00345085
2L	12098105	A	G	0.34914	0.00375486
2L	12102620	G	A	0.348375	0.000957307
2L	12106021	A	G	-0.29837	0.00376569
2L	12110816	T	C	-0.288845	0.00358225
2L	12118222	G	T	0.341036	0.00124902
2L	12119880	G	C	-0.329173	0.00098158
2L	12127239	G	A	-0.318427	0.00294326
2L	12130743	A	G	-0.293132	0.0033663
2L	12141296	T	C	0.364073	0.00296175
2L	12154788	G	C	0.45431	0.0028983
2L	12157460	C	G	0.389992	8.14531e-05
2L	12157698	C	T	0.385427	0.000152347
2L	12158072	C	G	-0.309218	0.00379104
2L	12158074	A	G	-0.330189	0.00212056
2L	12158227	C	T	-0.360293	0.00174601
2L	12158262	C	G	-0.333864	0.00372251
2L	12158545	G	A	-0.338389	0.000695015
2L	12158830	A	T	-0.289245	0.00199773
2L	12158841	T	A	-0.307617	0.00101967
2L	12158857	A	G	-0.309322	0.000980703
2L	12158865	T	G	-0.313911	0.000949777
2L	12164771	G	C	0.268218	0.00279817
2L	12166484	A	G	0.372585	0.0011169
2L	12180064	T	C	0.262401	0.00383354
2L	12181390	G	T	-0.415417	0.00200522
2L	12183898	T	A	-0.444931	0.000156903
2L	12201843	T	G	-0.40988	7.41293e-05
2L	12208006	C	A	0.29482	0.00266589
2L	12208258	T	C	-0.407138	0.000156644
2L	12208803	G	A	0.289766	0.00200166
2L	12254876	A	T	-0.417378	0.000153977
2L	12263419	T	G	-0.307709	0.00239007
2L	12266055	A	C	-0.322386	0.00128634
2L	12266743	G	T	0.320694	0.00365979
2L	12267543	T	C	-0.582297	6.73258e-05
2L	12278420	A	C	-0.388049	0.00148056
2L	12278709	G	A	0.337036	0.00378918
2L	1230708	A	C	0.396934	0.000892488
2L	12328174	C	A	0.295987	0.00312981
2L	12348580	T	C	-0.31678	0.00288297
2L	12360438	A	G	-0.366965	0.00239914
2L	1236561	T	A	0.28956	0.00277176
2L	12369374	C	A	0.273743	0.00387148
2L	12382762	T	C	-0.400477	0.00123081
2L	12401089	G	A	-0.366704	0.000990528
2L	12411115	C	T	-0.370363	0.000125224
2L	12412141	C	G	-0.277315	0.00255421
2L	12419643	T	A	-0.26977	0.00329766
2L	12440141	A	G	-0.463136	0.00098692
2L	12472476	T	A	-0.375182	0.00306319
2L	1249350	G	A	0.270481	0.00351355
2L	12499289	T	G	0.305599	0.00179651
2L	12521720	G	A	0.345008	0.00148527
2L	12525818	A	G	-0.304515	0.0016769
2L	12533572	G	T	-0.349541	0.000126845
2L	12533577	C	T	-0.319241	0.000481046
2L	12533621	C	T	-0.35505	0.000108991
2L	1253532	G	C	-0.320709	0.00379206
2L	1253835	C	T	0.328891	0.00357762
2L	1254817	T	G	0.303679	0.0022902
2L	1254818	T	A	0.291662	0.0037684
2L	12548376	C	G	0.308007	0.00370265
2L	12565961	A	T	-0.347037	0.00372064
2L	12567348	C	T	-0.323137	0.00101569
2L	12570703	A	C	-0.423444	0.00079068
2L	12577700	T	C	-0.400914	0.00140576
2L	12579022	T	C	-0.294637	0.00220093
2L	12587142	G	A	0.377131	0.000178997
2L	12587945	C	T	0.291131	0.00255821
2L	12587946	A	T	0.292572	0.00245579
2L	12593463	G	A	0.279791	0.00274107
2L	12603594	G	A	-0.412691	0.00326309
2L	12619143	A	G	-0.330307	0.00234032
2L	12621555	G	A	0.313834	0.00160018
2L	12632222	C	T	-0.522603	1.12677e-05
2L	12633416	A	G	-0.394153	1.91695e-05
2L	12634729	T	A	-0.352543	0.002178
2L	12644518	C	G	0.381894	0.000408405
2L	1264838	G	A	0.314274	0.000792743
2L	12650301	A	G	0.318634	0.00149848
2L	12650378	C	A	0.472442	1.2327e-05
2L	12650379	A	G	0.483892	7.86584e-06
2L	12653578	A	G	-0.304765	0.00274847
2L	1265831	T	C	0.341	0.0026465
2L	1265845	A	G	0.381516	0.00106682
2L	12689401	T	A	-0.328786	0.00153555
2L	12694322	T	A	0.338804	0.00283733
2L	12694363	G	A	-0.277017	0.00280903
2L	1270097	A	G	-0.390744	0.00237763
2L	12704653	T	G	-0.293337	0.00221902
2L	1271777	C	T	-0.434825	0.000212124
2L	12723854	A	G	-0.332512	0.000865837
2L	12729449	T	A	-0.314477	0.0020838
2L	12730278	T	C	-0.421443	0.0001113
2L	12761742	A	G	-0.41269	0.00102517
2L	1277154	G	A	0.369087	0.00232105
2L	1277709	C	T	-0.334484	0.00359484
2L	12778264	C	A	-0.447772	0.0024149
2L	12789484	A	G	-0.33139	0.00155917
2L	12799498	C	T	-0.319773	0.00296675
2L	12804808	A	T	0.370082	0.000237832
2L	12804836	A	T	-0.329948	0.000475133
2L	12804843	T	A	-0.373028	0.000107689
2L	12804850	A	T	-0.362982	0.000147276
2L	12823690	A	T	0.282026	0.0036503
2L	12826320	C	A	0.377992	0.0017665
2L	12834424	C	A	0.453616	0.000676678
2L	12854746	A	G	-0.307098	0.0022547
2L	12858785	A	G	-0.352174	0.000188209
2L	12866964	A	G	-0.328192	0.00171815
2L	12881640	G	T	0.291608	0.00229984
2L	12899078	C	G	-0.311181	0.00191161
2L	12899148	A	C	-0.286283	0.00334699
2L	12906400	A	G	0.296727	0.00304659
2L	12913819	C	T	0.357394	0.000478189
2L	1292523	A	C	0.719432	4.39455e-05
2L	12958001	A	G	-0.341774	0.000549208
2L	12958458	C	G	-0.403852	0.000785617
2L	12972623	A	G	0.340707	0.00144467
2L	12980567	C	T	0.427929	0.000964196
2L	12980643	C	T	-0.50601	4.92689e-05
2L	12981209	A	G	-0.335289	0.00355073
2L	12983353	T	A	0.266835	0.002955
2L	12983623	T	C	0.308899	0.00242895
2L	1300762	G	A	-0.31442	0.00207492
2L	13023303	G	A	0.322958	0.00162959
2L	13024061	C	T	0.492626	0.00042254
2L	13027785	A	G	-0.365827	0.000222092
2L	13027880	A	G	-0.459223	7.35788e-06
2L	13027924	T	G	-0.42369	2.3215e-05
2L	13028495	C	G	-0.330201	0.00251785
2L	13033226	A	C	-0.291584	0.00275903
2L	13034001	G	A	0.274828	0.00307613
2L	13034043	G	A	0.332457	0.000765744
2L	13034088	C	T	0.343317	0.000385354
2L	13047047	A	G	-0.407131	0.00126097
2L	13049134	G	A	0.33543	0.000818075
2L	13092227	C	G	-0.395432	0.00252418
2L	13113339	T	G	-0.334686	0.00182457
2L	13131935	C	T	-0.305203	0.00161395
2L	13131937	G	C	-0.334183	0.00204696
2L	13142491	C	G	-0.361199	0.00033511
2L	13142496	T	A	-0.32482	0.00157163
2L	13142501	T	C	-0.309567	0.00226495
2L	13142509	C	A	-0.358913	0.000244834
2L	13145142	T	A	0.496211	0.000148145
2L	1316778	T	A	0.303096	0.00375014
2L	13186585	G	A	-0.459629	0.00051416
2L	1319762	C	T	0.284774	0.00228168
2L	13197661	G	T	-0.382388	0.00199981
2L	13212869	C	T	0.274614	0.00301586
2L	13230175	T	C	-0.316155	0.00222641
2L	13241560	T	C	0.401847	0.000167106
2L	13241571	T	C	0.402159	0.000195336
2L	13248712	A	T	-0.292015	0.00126965
2L	13248746	T	C	-0.328519	0.000446799
2L	13258935	T	G	-0.350578	0.000550921
2L	13279362	G	C	-0.391382	0.00273293
2L	13284113	G	T	-0.303485	0.00381991
2L	13288658	G	T	-0.306438	0.00385392
2L	13295675	T	C	-0.287799	0.00145296
2L	13305576	A	G	-0.327706	0.00315424
2L	13305585	A	G	-0.453332	0.000162021
2L	13306355	G	A	0.375607	0.00321972
2L	13306951	G	C	-0.438534	0.000106893
2L	13306998	G	A	-0.358826	0.00143106
2L	13310627	A	C	-0.409266	0.00112128
2L	13310966	A	T	-0.308062	0.00387997
2L	13313292	C	T	-0.448778	0.00180296
2L	13313475	T	C	-0.292925	0.00216171
2L	13313643	T	G	-0.281672	0.00185557
2L	13321727	G	A	-0.321764	0.00318921
2L	13324156	T	C	0.315288	0.00342028
2L	13327611	A	G	-0.359174	0.000168157
2L	13331216	G	T	0.428545	0.000209292
2L	13331231	C	G	0.397299	0.000785379
2L	13331408	T	C	-0.406372	2.29375e-05
2L	13343222	T	C	0.342807	0.000340772
2L	13343255	A	G	0.28998	0.00295906
2L	13344168	T	C	0.315446	0.00138869
2L	13349045	G	T	0.371775	0.0001999
2L	13349221	G	A	0.315006	0.000472056
2L	13360020	T	C	-0.313614	0.00326699
2L	13400354	G	C	0.339726	0.00122657
2L	13412254	C	G	0.324037	0.0027453
2L	13421179	C	G	-0.326971	0.00110992
2L	13421182	A	G	-0.327168	0.0012027
2L	13427131	A	C	0.28952	0.00306909
2L	13429645	G	A	0.295266	0.00336203
2L	13430753	G	A	-0.332575	0.00367074
2L	13433604	G	C	-0.306797	0.000919608
2L	13433639	A	G	-0.271359	0.00352514
2L	1343611	T	A	-0.370166	0.00114559
2L	1343668	A	G	-0.342712	0.000702389
2L	13436822	G	A	0.318549	0.00166764
2L	13438652	A	G	0.310192	0.00350464
2L	13439845	T	A	0.27823	0.00288717
2L	13440250	G	T	0.33696	0.000239835
2L	13441898	C	G	-0.354992	0.000674011
2L	13443254	A	G	-0.569577	0.000467281
2L	13445386	C	T	-0.366494	0.00199443
2L	13445389	A	G	-0.380826	0.00119851
2L	13483974	T	C	-0.273807	0.00373417
2L	1351349	T	A	-0.304005	0.00379498
2L	13516688	T	G	0.613699	0.000669365
2L	13516689	A	C	0.552224	0.00207383
2L	13516690	T	C	0.566483	0.00164452
2L	13548362	T	A	-0.394361	0.000882403
2L	13548363	A	C	-0.36446	0.00194092
2L	13604034	C	T	0.290753	0.00308283
2L	13612554	T	C	0.273752	0.00244085
2L	13617898	A	T	-0.416883	0.000185299
2L	13618159	T	A	-0.445981	0.000471809
2L	13618185	C	T	-0.402031	0.00188954
2L	13619953	T	G	-0.383989	0.000261038
2L	1362467	A	T	0.487681	0.00285402
2L	13630371	A	G	-0.29854	0.00328929
2L	13668602	T	G	-0.34379	0.00290614
2L	13684375	T	C	0.332029	0.00237962
2L	1368871	T	C	0.286259	0.00272324
2L	13696833	A	G	0.35999	0.000246812
2L	13701085	A	G	-0.374931	0.0012967
2L	13701157	T	C	-0.401685	0.000510912
2L	13701166	A	C	-0.405318	0.000402272
2L	13705386	A	C	-0.406081	0.00256843
2L	13707136	C	A	-0.29839	0.00318313
2L	13707144	T	G	-0.316283	0.00167029
2L	13717173	A	C	0.464756	0.000182057
2L	13718148	C	T	-0.336985	0.00277224
2L	1372157	C	T	-0.416157	0.00193411
2L	13733768	C	T	0.435196	0.00331491
2L	13737846	C	A	0.433956	0.00276024
2L	13749119	G	A	0.270205	0.0036173
2L	13759361	T	C	-0.416644	0.00207759
2L	13766572	C	G	-0.34687	0.00112998
2L	13766577	A	T	-0.364476	0.000630681
2L	13766584	C	T	-0.344937	0.00133192
2L	13787995	C	T	0.269701	0.00387982
2L	13800222	C	G	0.540801	0.00133517
2L	13801854	T	A	-0.279006	0.00256835
2L	13801855	C	A	-0.278284	0.00248373
2L	13825893	T	C	0.378136	0.00214172
2L	13838508	T	G	0.432142	0.000774446
2L	13838764	T	C	0.297017	0.000727146
2L	13848833	G	A	0.352796	0.00283762
2L	1385366	A	C	-0.319419	0.00251033
2L	1385512	C	T	-0.29453	0.00259704
2L	13863134	G	C	0.295399	0.00299298
2L	1386930	A	C	-0.291763	0.00355063
2L	1388127	T	A	-0.344827	0.00189573
2L	13918744	G	C	0.315052	0.00129853
2L	13924341	A	G	0.542555	7.28155e-05
2L	1392617	A	C	-0.464449	0.000510977
2L	1392618	T	A	-0.506703	0.000185998
2L	13945424	A	G	-0.359854	0.00249511
2L	13946984	T	C	-0.292127	0.00134723
2L	13976705	A	C	-0.366836	0.00140154
2L	14004456	A	T	0.385393	0.00384347
2L	14004458	T	A	0.428077	0.00123185
2L	14031431	A	C	-0.360633	0.00325612
2L	14032524	T	C	-0.353548	0.0012437
2L	1404213	A	C	-0.286145	0.00204024
2L	14044967	T	C	0.343184	0.00187482
2L	14063200	G	A	-0.319105	0.00302979
2L	14118877	T	A	-0.328474	0.00133811
2L	14124599	G	C	0.376896	0.00221092
2L	14125351	A	G	-0.285828	0.0038109
2L	14125368	T	C	0.283041	0.00221407
2L	14125388	T	G	-0.286859	0.00374235
2L	14125455	C	T	-0.302367	0.00186395
2L	14125457	G	A	-0.32022	0.000945766
2L	14125525	A	T	-0.399244	7.86371e-05
2L	14135817	A	T	0.513064	0.000115565
2L	14151283	T	C	0.431558	0.00220036
2L	14151588	T	G	-0.428195	6.25492e-06
2L	14151602	G	A	-0.46828	6.49958e-06
2L	14151617	T	C	-0.401918	1.82477e-05
2L	14176734	A	T	-0.286797	0.00318548
2L	14177321	T	C	0.284429	0.00254803
2L	14186285	A	C	0.445376	0.00169834
2L	14207062	G	C	-0.323447	0.00288689
2L	14211295	T	C	-0.323931	0.00358567
2L	14211303	C	A	-0.391417	0.000569619
2L	14211304	G	T	-0.338735	0.00268193
2L	14241196	A	G	-0.328225	0.0011573
2L	1424738	T	C	0.296151	0.00140195
2L	14252844	T	C	0.593579	7.65703e-06
2L	14253077	T	C	-0.304993	0.00281089
2L	14253287	A	C	0.397419	0.00171546
2L	14254699	C	T	-0.384578	0.00105884
2L	14254701	C	T	-0.362769	0.00192042
2L	14254703	T	C	-0.363032	0.00187992
2L	14259715	A	G	0.384946	0.00239586
2L	14261255	G	A	0.283813	0.0027006
2L	1431270	C	T	-0.432196	0.00224293
2L	14313915	C	T	-0.360583	0.00216941
2L	14327240	C	G	0.387336	0.002059
2L	1432880	T	G	-0.303117	0.00187661
2L	14331703	G	A	0.439042	1.22851e-05
2L	14331739	T	C	0.391538	0.000140652
2L	14333090	A	G	0.425829	0.00200041
2L	14333091	C	A	0.549589	0.000204513
2L	1433395	G	T	0.327774	0.00293841
2L	14347451	A	G	-0.359231	0.00173062
2L	14347764	T	C	-0.321028	0.00135674
2L	14348013	C	T	-0.292853	0.00299387
2L	14348016	C	T	-0.293821	0.00305954
2L	14349979	A	G	-0.320652	0.00150972
2L	14349986	A	T	-0.381348	0.000219868
2L	14350006	A	G	-0.30631	0.0019456
2L	14356852	G	T	-0.31971	0.00330011
2L	14359092	T	G	0.355984	0.00217518
2L	14359093	C	T	0.351701	0.00249449
2L	14359134	C	T	0.549327	0.000137635
2L	14359146	T	A	0.439837	0.0005063
2L	14364226	G	A	-0.393792	0.0033043
2L	14383362	G	T	-0.33517	0.00210906
2L	14388703	T	C	-0.337721	0.000300445
2L	14397778	C	T	0.333627	0.00119998
2L	14399184	A	G	-0.284098	0.00187306
2L	14401789	T	G	-0.483822	7.25632e-06
2L	14401792	A	G	-0.438223	4.44118e-05
2L	14401798	G	T	0.434931	0.000403457
2L	14404538	A	G	-0.26475	0.0038607
2L	14405699	G	A	-0.33185	0.00125232
2L	14416560	A	G	-0.334473	0.00125026
2L	14416642	A	C	-0.309414	0.00147103
2L	14425390	G	A	-0.351476	0.000967951
2L	14425853	T	C	0.317525	0.00195328
2L	14425854	T	A	0.318174	0.00239612
2L	1442696	C	G	0.289477	0.00389286
2L	14431152	T	G	0.285628	0.00197323
2L	14439894	T	A	-0.253025	0.00370406
2L	14441570	A	C	-0.504163	0.00173514
2L	14443119	G	A	0.362391	0.000591913
2L	14452488	C	A	-0.292285	0.00196359
2L	14452758	A	T	-0.366756	0.000142089
2L	14453862	G	A	0.36354	0.000697856
2L	14456685	G	C	-0.323097	0.00178622
2L	14458263	C	T	0.352401	0.00265478
2L	14458281	G	A	0.379064	0.00126791
2L	14460340	G	A	-0.297136	0.000837916
2L	14486221	C	G	0.619506	0.000520368
2L	14495973	A	C	-0.334546	0.00221892
2L	14513875	T	C	-0.380828	0.00084058
2L	14536629	T	C	-0.344736	0.000163899
2L	14540169	G	C	-0.365348	0.00309112
2L	14543505	G	A	0.485037	0.0019968
2L	14545934	A	C	-0.346561	0.000863653
2L	14546527	T	A	-0.465292	0.00019954
2L	14548798	G	A	0.339677	0.00155466
2L	14556834	G	T	0.432962	0.00116679
2L	1456482	C	T	-0.276005	0.00357638
2L	14576389	T	C	0.278895	0.00378927
2L	14583686	A	T	-0.322352	0.00325434
2L	14583782	G	T	-0.483423	9.62688e-06
2L	14583787	A	T	-0.416236	0.000288807
2L	14587776	T	A	-0.341413	0.00181674
2L	14587779	C	G	-0.321163	0.00312309
2L	14587787	A	T	-0.320205	0.00312592
2L	14611575	A	G	-0.298225	0.002346
2L	14641458	T	A	0.291984	0.00156171
2L	14657285	G	A	0.322087	0.000505838
2L	14658805	T	C	-0.356788	0.00280097
2L	1466552	A	C	0.283931	0.00306489
2L	14671119	C	A	0.376534	0.00260816
2L	14671134	G	T	0.447039	0.000424581
2L	14685614	G	A	-0.305072	0.00365974
2L	14686972	G	T	-0.294356	0.00319912
2L	14690352	G	C	-0.291955	0.0023515
2L	14690894	C	G	-0.357259	9.74425e-05
2L	14690910	A	G	-0.306445	0.000660026
2L	14690941	T	A	-0.458563	9.02855e-06
2L	14693918	C	T	0.30411	0.00277159
2L	14697228	G	A	-0.303916	0.00383875
2L	14713448	G	A	-0.457184	0.000245868
2L	14713449	C	G	-0.434617	0.000462372
2L	14731022	C	A	-0.275902	0.00302011
2L	14744457	T	C	-0.450772	8.28828e-05
2L	14744467	T	C	-0.467202	5.56734e-05
2L	14744568	G	A	-0.259648	0.00309378
2L	14747931	A	T	0.324989	0.000913912
2L	14749075	A	G	0.330505	0.000568902
2L	14749082	C	A	0.334657	0.00068011
2L	14749084	T	C	0.338251	0.000510698
2L	14749392	A	G	0.324564	0.00343412
2L	14749664	G	A	0.281164	0.00202052
2L	14752495	G	A	-0.338791	0.00125763
2L	14754711	A	T	-0.319357	0.00172734
2L	1477367	G	A	-0.305883	0.00383036
2L	14800499	T	G	-0.454042	0.000740613
2L	14801129	A	G	-0.447334	6.00784e-05
2L	14814212	T	G	-0.295773	0.00321677
2L	14841373	G	C	0.29076	0.00316234
2L	14848401	T	A	-0.420637	0.00251647
2L	14875656	C	G	-0.324092	0.00139606
2L	14876495	T	C	-0.311106	0.000769578
2L	14897464	C	A	-0.342694	0.00300495
2L	14903070	C	T	-0.353143	0.000415243
2L	14914421	G	A	0.31281	0.0017023
2L	14920458	T	A	0.358081	0.0022629
2L	14941264	A	T	0.355347	0.00103799
2L	14953248	G	C	-0.447064	0.000649536
2L	14954108	T	A	-0.351976	0.000200373
2L	14954109	T	A	-0.373596	0.000129773
2L	14954267	A	G	-0.322372	0.000890843
2L	14956435	T	A	-0.368679	0.00197444
2L	14957488	A	T	0.484554	4.02128e-05
2L	14967014	T	A	0.379004	0.00301381
2L	14971725	C	G	0.430238	0.00342444
2L	1497286	T	C	-0.402636	0.000801701
2L	14983302	C	A	0.28444	0.00242057
2L	15003187	A	G	-0.298716	0.00298546
2L	15005464	G	C	-0.387892	0.00289856
2L	15027014	T	A	-0.430092	0.00192238
2L	15042250	T	G	0.29581	0.00257047
2L	15042273	G	A	0.358698	0.000619199
2L	15042274	C	T	0.351467	0.000775805
2L	15043375	C	T	0.27511	0.00319276
2L	15044577	C	A	0.295336	0.0021599
2L	15044581	T	C	0.295775	0.00213707
2L	15044960	C	T	0.335788	0.00265153
2L	15059878	C	T	-0.306596	0.00319395
2L	15080474	T	A	0.328339	0.00228781
2L	15083014	T	C	0.295982	0.00325899
2L	15083603	C	A	0.372097	0.00362028
2L	15093128	A	T	0.322104	0.000441819
2L	15098164	A	T	0.351257	0.00235418
2L	15098188	T	C	0.345494	0.00235372
2L	15110337	T	C	-0.286209	0.00377775
2L	15117185	T	A	0.315564	0.00274789
2L	1512903	G	A	0.385057	0.00265474
2L	1514507	G	T	0.294272	0.00270532
2L	1514515	G	T	0.288968	0.00325336
2L	15150456	A	G	-0.297277	0.00184958
2L	1515442	A	G	-0.318306	0.000950711
2L	1515967	C	T	-0.327343	0.000918256
2L	1516012	T	C	-0.36757	0.000379483
2L	15176243	T	C	-0.33194	0.00221136
2L	15223506	T	C	-0.421124	0.000207222
2L	15241329	G	A	-0.3382	0.000367585
2L	15241348	C	G	-0.271543	0.00364248
2L	15241672	T	A	0.294812	0.00145239
2L	1526451	C	A	-0.315492	0.00115559
2L	15276549	A	T	-0.326801	0.000891375
2L	15296940	C	A	-0.435524	0.00225335
2L	15301037	G	A	-0.277255	0.00371324
2L	15317888	G	C	0.480079	0.00269879
2L	15317921	A	T	0.442958	0.00331253
2L	15324395	A	C	-0.305079	0.00240196
2L	15339713	A	T	0.414315	0.000277605
2L	15339825	T	G	-0.280554	0.00336139
2L	15347117	C	A	-0.335945	0.00247148
2L	15367770	T	A	0.358563	0.000415326
2L	15409080	C	A	-0.367555	0.0025008
2L	15414451	A	G	-0.296264	0.00229511
2L	15419048	A	G	-0.319496	0.00382118
2L	15419681	A	G	0.273414	0.00304823
2L	15419707	C	A	-0.316452	0.000913092
2L	15421822	C	T	-0.372651	0.0025072
2L	15464299	G	A	0.367579	0.00311103
2L	15464425	A	C	0.400882	0.00176071
2L	15464463	T	G	0.380118	0.00186015
2L	15464670	A	G	-0.363634	0.000235573
2L	1546836	C	T	0.34012	0.00102086
2L	15470054	G	A	-0.346598	0.000328891
2L	15471909	A	G	0.460044	0.000297737
2L	15473504	C	A	0.319398	0.000952537
2L	15477352	C	T	0.365271	0.000761513
2L	15482492	G	A	0.403039	0.00128706
2L	15514474	T	C	-0.402828	0.00353737
2L	15533706	C	A	-0.29071	0.00368676
2L	15545683	A	T	-0.406483	0.00205029
2L	15546867	C	T	-0.443988	0.000783795
2L	15559469	A	G	-0.381422	0.00127
2L	15563998	T	A	-0.397998	0.0011347
2L	15606115	A	G	0.361153	0.00230723
2L	1566085	T	C	-0.310768	0.00240994
2L	1566113	A	G	-0.324589	0.00143993
2L	1569726	T	G	-0.269352	0.00366961
2L	15730108	A	G	-0.31116	0.00352722
2L	15736384	T	A	0.447978	0.00233907
2L	1574939	T	C	-0.335493	0.00324056
2L	15750484	C	T	0.293416	0.00198884
2L	15752454	C	G	-0.341895	0.0011754
2L	15752523	G	A	-0.349035	0.00042873
2L	15754368	C	G	0.349601	0.00136122
2L	15799016	G	A	-0.322745	0.0031479
2L	1583477	C	T	0.436521	0.00138489
2L	15850232	T	G	0.38065	0.00278557
2L	15869702	A	G	-0.268048	0.00327419
2L	15899846	C	T	0.290552	0.00276601
2L	15904345	G	C	0.333533	0.000647267
2L	15904358	C	A	0.326383	0.00105154
2L	15904480	T	A	0.309315	0.00148741
2L	15904566	G	A	-0.465413	0.000262262
2L	15948822	A	G	0.456497	0.000219059
2L	15949145	T	C	0.450037	0.000240052
2L	15955040	A	G	-0.32843	0.00335243
2L	15964676	A	G	-0.3076	0.00329258
2L	16002081	C	T	0.356157	0.0038276
2L	16023206	A	G	-0.29761	0.00217391
2L	16023216	T	A	-0.308471	0.00173743
2L	16049449	G	T	-0.317285	0.00260452
2L	16050365	C	T	-0.331304	0.00364541
2L	1605282	T	G	-0.425966	0.00134926
2L	1605945	G	C	-0.286044	0.00183913
2L	1605965	A	G	-0.291903	0.0022412
2L	16076109	C	T	-0.377898	0.000189087
2L	16076142	A	G	-0.34165	0.000524262
2L	1608081	T	C	-0.297098	0.0017746
2L	16083650	A	T	-0.349644	0.0014243
2L	16083652	A	G	-0.350086	0.00125042
2L	16083693	T	C	-0.341679	0.00138268
2L	16086559	G	T	0.313718	0.00268005
2L	16095869	A	G	-0.413489	0.0015949
2L	16097642	T	A	0.33012	0.00225481
2L	1610797	A	C	-0.293738	0.00303782
2L	16116488	A	G	-0.310178	0.00195528
2L	16121996	G	A	-0.311265	0.00384049
2L	16123743	T	C	-0.300555	0.00235101
2L	16128379	G	C	0.351275	0.000269726
2L	16128449	A	G	0.380332	9.68489e-05
2L	16137478	A	T	-0.552952	0.00280336
2L	1613845	A	G	-0.29401	0.00231405
2L	16149694	A	G	0.321384	0.0017774
2L	16149982	A	T	-0.426803	0.000951087
2L	16165671	C	G	-0.368904	0.00225222
2L	16179698	T	A	0.445283	0.0032421
2L	16179918	T	A	0.376077	0.000435093
2L	16188658	A	C	0.338939	0.00108778
2L	1621268	G	A	0.37707	0.00306878
2L	16222461	C	T	-0.287076	0.0024117
2L	16223947	G	T	0.310883	0.00089739
2L	16235890	C	T	-0.316088	0.00265633
2L	16265878	C	G	-0.339492	0.00230925
2L	1629012	T	C	-0.354974	0.00351722
2L	1630320	A	T	0.275393	0.00377506
2L	16308534	C	T	0.330583	0.00203939
2L	1630958	T	C	-0.334941	0.00283133
2L	1632786	G	T	-0.375869	0.00324376
2L	16362145	C	G	-0.495787	0.000982456
2L	16368460	A	T	0.325905	0.000358412
2L	16380680	T	C	0.340016	0.0035763
2L	16382084	T	A	-0.308116	0.0017446
2L	16382841	A	T	0.287992	0.00246184
2L	16382850	G	A	0.297795	0.00180175
2L	16394479	A	G	0.338295	0.00320082
2L	16395313	G	T	-0.337973	0.000828439
2L	16408565	C	T	0.310679	0.0014177
2L	1641782	C	T	0.286677	0.0022027
2L	16435039	A	G	0.304317	0.0024121
2L	16441306	C	T	-0.403637	0.00329515
2L	16441361	C	T	0.317323	0.00111559
2L	16446206	T	C	-0.336244	0.000875774
2L	16467497	T	C	0.311867	0.00168571
2L	16470049	G	C	0.317526	0.00163964
2L	16470931	T	C	0.381984	0.00131516
2L	16503253	T	C	0.331277	0.000366411
2L	16503259	G	A	0.268404	0.00346768
2L	16503264	C	T	0.292809	0.00130881
2L	16504104	C	T	0.31237	0.000853663
2L	16536809	A	G	-0.296395	0.00214332
2L	16539723	T	C	-0.399142	0.00143893
2L	16544474	A	G	-0.323973	0.00180299
2L	16553654	G	A	-0.390505	0.000353999
2L	16569330	G	A	-0.447082	0.00212744
2L	16572092	T	A	0.301586	0.00141267
2L	16572171	G	T	-0.345752	0.000531143
2L	16572189	A	G	0.401572	5.41212e-05
2L	16572191	C	G	0.453955	5.0808e-06
2L	16572192	G	A	0.430933	1.66916e-05
2L	16572206	T	G	-0.318116	0.00187111
2L	16581938	A	T	-0.290887	0.00284117
2L	16582595	A	C	0.370993	0.000342634
2L	16590998	T	C	0.443095	0.00337974
2L	16597878	T	G	0.554536	5.67991e-05
2L	16597892	C	T	0.375655	0.00118252
2L	16597911	T	A	0.455557	0.00292984
2L	16597921	G	T	0.354745	0.00271559
2L	16622117	T	C	-0.372868	0.00204928
2L	16626545	T	G	0.296955	0.00331908
2L	16628467	T	C	0.442744	0.000550449
2L	16640785	G	A	-0.481597	0.00155822
2L	16648101	C	T	-0.402808	0.00273786
2L	1665323	G	A	-0.363198	0.000838514
2L	16654773	A	G	-0.301736	0.00326728
2L	16657962	A	C	-0.340173	0.00108345
2L	16670259	A	C	0.355927	0.000242969
2L	16688007	G	T	-0.348299	0.00179925
2L	16698326	C	T	0.549671	0.000841299
2L	16698329	C	T	0.557828	0.000689012
2L	16706895	G	A	0.500574	0.00029811
2L	16719079	G	A	0.316523	0.000920238
2L	16760685	G	A	0.321229	0.00107736
2L	16771518	T	C	-0.323036	0.00248534
2L	16794419	G	A	-0.360781	0.0034714
2L	16797627	T	G	0.306811	0.00333159
2L	16931916	C	G	-0.324445	0.00338676
2L	1695615	A	G	-0.290002	0.00375402
2L	1697951	G	A	0.310591	0.00199663
2L	17004948	A	T	0.374318	0.00175238
2L	17019648	C	A	0.338811	0.000910855
2L	17022921	C	T	0.32241	0.000912676
2L	17024856	A	G	0.300621	0.00229183
2L	17024865	G	A	0.37714	0.000528227
2L	17030091	T	A	0.339193	0.00177779
2L	17074176	T	C	0.286401	0.00387743
2L	17080206	C	T	0.274413	0.0036114
2L	17081895	G	T	-0.383338	0.00173113
2L	1709452	C	G	-0.332104	0.000401528
2L	1709453	C	A	-0.378086	8.41143e-05
2L	1709454	T	C	-0.295764	0.00167079
2L	17097356	C	T	-0.378693	0.000379263
2L	17099962	A	G	0.35178	0.00060486
2L	17117396	A	G	-0.330124	0.0029265
2L	17172180	T	A	0.456695	0.00137524
2L	1717576	T	C	-0.38355	0.00216079
2L	1717580	C	T	-0.426388	0.000707027
2L	1717582	C	T	-0.370377	0.00312152
2L	1718849	A	C	-0.359913	0.00205743
2L	17188587	T	A	0.326905	0.00329461
2L	17211115	T	A	0.354325	0.000933077
2L	17212725	T	G	0.550099	3.4139e-05
2L	17219830	G	C	0.353864	0.000120162
2L	17222859	T	A	0.285663	0.00355123
2L	17224079	G	A	0.423706	0.000173658
2L	17230378	T	G	-0.308983	0.00192318
2L	17230393	A	G	-0.302985	0.00234018
2L	17247154	T	C	0.33786	0.00143928
2L	17290992	T	C	0.284413	0.00227594
2L	17293670	T	C	-0.310712	0.00338899
2L	17298015	A	G	-0.384766	0.00334351
2L	17298187	G	A	0.356709	0.00209253
2L	17369723	A	C	-0.303346	0.00340303
2L	17384384	A	T	-0.313265	0.00107613
2L	17436186	T	C	0.386738	1.36321e-05
2L	17484290	A	T	0.303263	0.00161239
2L	17552164	C	G	-0.295499	0.00312792
2L	17552165	C	G	-0.29426	0.00335664
2L	17552170	T	A	-0.2817	0.00318624
2L	17577657	C	G	0.511481	0.000793343
2L	17577683	A	G	0.392034	5.16562e-05
2L	17577780	C	T	0.350782	0.00115606
2L	17587211	C	T	0.388961	0.00040111
2L	17610411	G	T	0.302391	0.00194214
2L	17619926	T	G	-0.328368	0.000835932
2L	17619977	T	C	-0.299032	0.00292279
2L	17620004	T	C	-0.334135	0.000896682
2L	17631654	T	G	-0.325184	0.00366307
2L	17646751	A	C	-0.311522	0.000745183
2L	17646752	T	C	-0.282901	0.00220336
2L	17646779	C	A	0.334999	0.00231694
2L	1766698	C	T	0.418997	0.000411442
2L	1770900	T	G	-0.391842	0.00200087
2L	1770903	A	T	-0.409395	0.00147143
2L	1770906	A	G	-0.375397	0.00321434
2L	17719408	C	T	0.350043	0.000783675
2L	17764752	T	A	0.327514	0.0014895
2L	17783585	A	G	0.350739	0.000454383
2L	17783591	C	T	0.321256	0.00121607
2L	17794365	C	T	0.338371	0.00379225
2L	17799009	G	A	0.454666	3.00999e-05
2L	1782387	T	C	0.390258	0.00133835
2L	1782554	C	T	0.494043	0.000210681
2L	17845573	A	G	-0.349574	0.000480292
2L	17858284	C	G	0.373854	0.00236259
2L	17900534	A	T	0.41277	0.00301337
2L	17957785	T	G	-0.380008	0.000983615
2L	17964272	A	C	-0.290168	0.00350895
2L	17964309	G	A	-0.305375	0.00191814
2L	17964318	T	G	-0.321774	0.00104674
2L	17967704	T	C	-0.29461	0.00243036
2L	1798490	A	G	-0.373841	0.00126427
2L	1799903	A	T	-0.357557	0.00302953
2L	1800576	T	G	-0.412433	0.00223387
2L	1800579	T	A	-0.40208	0.00334729
2L	1800624	G	T	-0.42864	0.00251167
2L	18020378	T	C	0.359073	0.00260723
2L	18041578	A	G	0.420154	0.00250176
2L	18099259	G	T	-0.406646	0.00103801
2L	18131996	C	T	-0.322424	0.00105072
2L	18150224	T	A	0.451813	0.00203716
2L	18152727	C	T	0.291034	0.00160342
2L	18153913	A	C	-0.280694	0.0029175
2L	18153915	A	T	-0.275851	0.00361339
2L	18162185	G	T	-0.390928	0.000132563
2L	18178321	A	C	-0.303948	0.0010435
2L	18212416	A	C	-0.279425	0.00276282
2L	18216851	A	G	-0.32262	0.00113459
2L	18249657	C	T	0.356192	0.0036597
2L	1831948	A	G	-0.309957	0.0011465
2L	1838232	A	G	-0.34813	0.00211244
2L	18402939	A	C	-0.279614	0.00270007
2L	1842440	T	C	-0.357229	0.00360279
2L	18426874	T	A	-0.35698	0.0017015
2L	18433191	G	A	0.417456	0.000329456
2L	18434128	A	T	0.408674	4.60401e-05
2L	18472612	G	A	0.431597	0.000572483
2L	18486855	C	A	-0.303677	0.00290698
2L	18490442	A	G	-0.296083	0.00260923
2L	18500795	C	A	0.387255	0.00130546
2L	18504534	A	G	-0.314684	0.00261661
2L	18535292	C	G	0.297119	0.00132658
2L	18535302	A	G	0.309528	0.00119723
2L	18535303	G	A	0.441297	0.000666719
2L	18535306	A	T	0.284247	0.00279645
2L	18535312	T	C	0.2838	0.0024472
2L	18535366	G	A	0.284023	0.00261851
2L	18566902	T	C	0.270432	0.00311079
2L	18590846	C	A	-0.276109	0.00195924
2L	18624259	G	T	-0.376509	0.0038171
2L	18653837	A	G	-0.29725	0.00325038
2L	18653845	C	T	-0.311903	0.0021791
2L	18680789	C	T	-0.323349	0.00134909
2L	1868259	T	C	0.464658	0.00312782
2L	18767388	C	T	0.398069	7.6131e-05
2L	18802220	C	T	0.44619	0.00131378
2L	18830221	G	A	-0.308766	0.00285735
2L	1883050	A	G	-0.446446	0.00244341
2L	18836864	G	A	-0.324288	0.00101684
2L	18867290	C	T	-0.272129	0.00317317
2L	18867768	G	C	-0.372262	0.000573182
2L	18870204	C	T	0.331675	0.000427555
2L	1888131	C	T	-0.591775	0.00248542
2L	18896999	A	G	-0.530614	0.000165998
2L	18897011	T	G	-0.386775	0.00305694
2L	1889703	G	A	-0.365228	0.000203408
2L	1890040	C	A	-0.454043	0.00127728
2L	18911751	T	C	-0.306536	0.00195534
2L	18929580	C	T	-0.378033	0.00157841
2L	18933412	G	C	-0.324301	0.00295415
2L	18938658	G	A	-0.313489	0.00124706
2L	18938664	C	T	-0.294935	0.00251213
2L	18938690	A	G	-0.357863	0.000584338
2L	18955225	C	T	0.330613	0.0019287
2L	18955229	A	C	0.313508	0.00354892
2L	18959800	A	C	-0.36763	0.00176439
2L	19018993	T	A	0.425866	0.00382977
2L	1906681	A	C	-0.399294	0.00242975
2L	19080838	A	T	-0.296602	0.00284382
2L	19089233	G	A	0.349767	0.00148169
2L	19090031	T	C	-0.386456	0.000164086
2L	19099284	T	C	0.337671	0.00179564
2L	1910011	T	A	-0.378444	0.0021635
2L	19102688	G	A	-0.290528	0.00260807
2L	19128757	A	G	-0.364045	0.00139725
2L	1916113	A	C	-0.309403	0.000999049
2L	1916647	T	C	-0.299355	0.00128663
2L	1916656	T	A	0.388858	0.00118658
2L	19170167	G	A	-0.334695	0.00229886
2L	1917993	C	A	-0.322557	0.0016929
2L	19185161	C	G	-0.323171	0.00327601
2L	19185167	G	A	-0.367033	0.000223461
2L	19194550	C	T	-0.260391	0.0030055
2L	1921108	C	A	0.324323	0.000437882
2L	19232963	T	G	-0.321376	0.000534201
2L	19240950	T	G	0.570073	2.52982e-06
2L	19244281	A	C	0.365957	0.000913582
2L	1925700	C	A	-0.303775	0.00261011
2L	19265020	C	T	0.267999	0.00289136
2L	19265241	T	C	-0.375039	0.000828312
2L	1926930	G	A	-0.4673	0.000555778
2L	19276149	C	A	0.342148	0.00301538
2L	19278127	A	T	0.334705	0.00198142
2L	19282858	T	C	-0.308067	0.00374829
2L	19289050	G	T	0.326198	0.000595828
2L	19289051	A	G	0.350549	0.000226696
2L	1929163	A	T	0.338069	0.000611516
2L	19292271	C	T	-0.381983	0.00310294
2L	19294573	T	C	-0.396875	0.00085907
2L	19294576	G	C	-0.405067	0.000666338
2L	1929505	A	G	-0.294485	0.00300156
2L	1935728	T	A	-0.350033	0.000305081
2L	1935747	T	C	-0.385336	6.91815e-05
2L	19408487	T	C	-0.341495	0.000901622
2L	19408492	T	A	-0.315168	0.00185636
2L	1941637	T	C	-0.378646	0.000662826
2L	19462122	C	T	0.314849	0.00182623
2L	19464423	G	C	0.341976	0.000696495
2L	19464436	T	G	0.337696	0.000764976
2L	19469132	T	A	0.317264	0.0012146
2L	19469502	A	T	0.307906	0.00211336
2L	1949453	T	C	-0.341304	0.0031854
2L	1950423	C	T	0.345533	0.00078946
2L	19508093	C	A	0.398659	0.00257986
2L	19515738	T	C	-0.553823	0.000447773
2L	19584368	T	A	0.42142	0.00279473
2L	1960637	T	C	-0.349063	0.000213327
2L	1960639	G	C	-0.296097	0.00168746
2L	19608789	G	A	-0.373834	0.00300358
2L	19612501	A	C	-0.323654	0.00252355
2L	19644901	T	G	0.422722	0.00139391
2L	19647557	A	T	0.504822	0.002132
2L	19720629	C	G	0.567651	0.000965825
2L	1972128	T	G	-0.368908	0.00102576
2L	19723057	G	C	-0.270164	0.00320612
2L	1975018	G	C	-0.371998	0.000252721
2L	1975029	C	G	-0.394287	8.60814e-05
2L	1975076	A	G	-0.488265	4.35614e-06
2L	1975094	C	T	-0.333802	0.00137587
2L	19757563	A	G	-0.366582	0.000997512
2L	19792536	C	T	-0.287022	0.00193866
2L	19795918	C	A	0.30759	0.000897633
2L	1979658	G	A	-0.312207	0.00236259
2L	1982821	C	G	-0.418301	0.0005228
2L	19830594	G	T	0.336525	0.000903143
2L	19844896	C	G	-0.38355	0.000290455
2L	19850771	C	T	-0.448873	0.00152541
2L	19853180	G	A	-0.289233	0.00320141
2L	1986893	T	A	0.302051	0.00235581
2L	1986960	C	A	0.33446	0.000554234
2L	1986989	A	C	-0.321341	0.000715146
2L	1988011	T	C	-0.342958	0.000992758
2L	1988022	A	T	-0.332492	0.00159087
2L	1988023	T	C	-0.31988	0.00232666
2L	19891513	G	T	0.299724	0.00300225
2L	19891514	A	G	0.304059	0.0022199
2L	19905884	A	C	-0.338056	0.00145065
2L	19906134	T	C	0.300198	0.0022117
2L	19923903	C	T	0.366074	0.000637982
2L	19923914	C	T	0.3498	0.000861274
2L	20021408	A	G	-0.328372	0.000699673
2L	20033771	G	C	0.295991	0.00286017
2L	20034993	G	T	0.276016	0.00356644
2L	20042184	A	T	-0.459862	9.79808e-05
2L	20045155	T	G	-0.430734	0.00143116
2L	20066166	T	A	0.329272	0.00316839
2L	20100138	A	G	-0.374829	0.000501514
2L	20134030	G	C	-0.35908	0.0021149
2L	20144384	T	C	-0.53433	0.000141109
2L	20144402	G	A	-0.287093	0.0024455
2L	2014773	T	A	-0.290199	0.00127438
2L	2015424	T	G	0.316885	0.0012035
2L	20223043	T	C	0.469775	0.00153734
2L	20225858	C	T	0.29017	0.00213554
2L	20234572	A	G	0.36363	0.00368863
2L	2023947	C	A	0.480986	0.00043294
2L	20402845	C	G	-0.372636	0.00100669
2L	20402857	A	G	-0.373182	0.00149525
2L	20460423	T	C	-0.392605	0.000164733
2L	20460425	C	T	-0.373779	0.00033307
2L	20474062	G	T	-0.34276	0.000310051
2L	20474163	C	T	-0.503477	1.19312e-06
2L	20474175	C	T	-0.476217	7.04427e-06
2L	20487690	G	A	0.457095	0.0006826
2L	20487697	T	C	0.404118	0.00269532
2L	20494766	C	A	-0.316227	0.00100207
2L	20511192	A	T	-0.478511	0.00208785
2L	20526377	T	C	-0.36917	0.00160072
2L	20553077	C	G	0.401242	0.00298098
2L	20644582	C	A	0.42737	0.00117695
2L	2067070	T	A	-0.421815	0.000588913
2L	2074047	A	T	-0.346691	0.00144724
2L	2074085	T	C	-0.382911	0.000862625
2L	20789412	A	C	0.277614	0.00360448
2L	2082479	T	A	0.499967	0.000915667
2L	2085907	C	T	0.323054	0.00128382
2L	2087279	G	A	0.381079	3.30062e-05
2L	2087653	A	G	0.291107	0.00267154
2L	2087878	G	C	0.399925	9.49454e-05
2L	2089749	A	G	0.435206	0.000401686
2L	20911634	T	A	-0.276397	0.00211702
2L	2097098	T	G	-0.298184	0.00350012
2L	2097586	G	A	-0.349126	0.00159799
2L	21003509	G	A	-0.480235	0.000213305
2L	21005169	A	G	-0.294855	0.00103002
2L	21005475	T	C	-0.422885	2.76178e-05
2L	21005606	T	A	-0.375226	0.000268619
2L	21005607	C	G	-0.342783	0.000758257
2L	21013555	G	C	-0.34821	0.000260388
2L	21016032	T	C	-0.320847	0.0013839
2L	21017755	G	A	-0.298897	0.00304508
2L	2109915	C	T	0.345146	0.00150591
2L	2110685	A	T	0.308093	0.000889986
2L	21125604	A	T	0.252836	0.00369374
2L	21185748	T	C	-0.383829	0.000789677
2L	2120643	C	G	0.315113	0.000829815
2L	2121035	G	C	0.286473	0.00298465
2L	2121105	C	A	0.382281	0.00277834
2L	2121106	C	A	0.374426	0.00367799
2L	2121237	A	T	0.398321	0.000146308
2L	2121320	G	C	0.43577	4.72851e-05
2L	2121555	G	A	0.52238	6.61275e-05
2L	2121578	C	G	0.358087	0.00228671
2L	2128114	C	T	0.276316	0.00215358
2L	21311056	C	G	0.274195	0.00326518
2L	2145954	G	C	-0.322022	0.00084371
2L	2166612	T	C	-0.312884	0.00145694
2L	2166622	A	G	-0.348525	0.0035821
2L	2166626	G	A	-0.367335	0.00237842
2L	2166666	T	C	-0.361592	0.000573328
2L	2181403	C	G	-0.419615	0.000371791
2L	2188606	T	C	-0.334813	0.0012258
2L	2188608	A	G	-0.334253	0.00130473
2L	22030394	C	T	0.274819	0.00267492
2L	22074111	G	A	-0.3158	0.00274073
2L	22077305	T	C	-0.282441	0.00272448
2L	22273103	A	G	0.575546	0.000187341
2L	2242582	A	C	0.326541	0.00122015
2L	22436324	G	C	0.400007	0.000120558
2L	2244759	C	A	-0.399409	0.000214036
2L	2244781	T	A	-0.385217	0.000407591
2L	2244794	T	C	-0.380733	0.000509248
2L	22525852	G	A	-0.297708	0.00348102
2L	2252981	A	T	0.361537	0.0019794
2L	2252986	C	T	0.354833	0.00211528
2L	22556021	C	T	-0.353056	0.00141098
2L	2258011	A	G	-0.293823	0.00370775
2L	2265968	A	G	-0.304136	0.00387929
2L	2270712	A	C	-0.351678	0.00278568
2L	2273940	T	C	-0.304958	0.00189702
2L	2274761	C	T	-0.309617	0.00246334
2L	2275700	A	G	-0.319988	0.00276284
2L	2276451	A	G	-0.304434	0.0020885
2L	2276454	T	C	-0.321331	0.00118328
2L	2287969	C	G	0.30114	0.00210371
2L	22896441	A	G	-0.284202	0.00374881
2L	2293261	T	G	-0.481493	2.98993e-05
2L	2301835	C	T	-0.418152	0.000413343
2L	2311489	G	A	-0.311414	0.00240497
2L	2311586	A	G	-0.319981	0.00159968
2L	2316317	G	A	-0.336286	0.00240337
2L	2316434	A	G	-0.328727	0.00286484
2L	2322000	G	T	0.371813	0.00126275
2L	2322009	T	A	0.339085	0.00301153
2L	2322014	T	G	0.333523	0.00365976
2L	2324375	T	A	-0.285414	0.00165145
2L	2335438	A	G	-0.306348	0.00144345
2L	2342010	A	G	-0.309538	0.0023683
2L	2342016	T	C	-0.351242	0.000327079
2L	2348926	A	T	-0.449672	0.000102734
2L	2352100	T	G	0.354097	0.00173719
2L	2355821	C	T	-0.434574	0.00215652
2L	2366704	C	T	-0.412259	0.00287538
2L	2379709	A	G	-0.349647	0.00169553
2L	2382170	T	C	-0.292121	0.00221132
2L	2419426	G	A	-0.292802	0.00302854
2L	2426311	G	T	0.325123	0.00227676
2L	2426318	A	G	0.342493	0.00111335
2L	2430554	G	A	0.332621	0.00186751
2L	2436456	C	T	-0.305585	0.00305673
2L	2456289	A	C	0.369293	0.00036107
2L	2456292	G	C	0.363037	0.000451843
2L	2456295	G	A	0.307522	0.003161
2L	2456321	G	A	0.327235	0.00126492
2L	2458608	A	G	-0.356207	0.0016531
2L	2460597	T	C	-0.369925	0.000110124
2L	2460598	C	T	-0.38636	5.10588e-05
2L	2460622	A	G	-0.294773	0.00163467
2L	2460651	G	T	-0.350227	0.000167254
2L	2460656	A	G	-0.366642	9.15192e-05
2L	2460671	T	C	-0.380611	0.000417906
2L	2460748	G	C	-0.320876	0.000486333
2L	2510583	T	A	-0.323425	0.00120882
2L	2513004	G	A	-0.279886	0.00228698
2L	2520058	A	G	-0.370033	0.000640452
2L	2530881	G	C	-0.398898	0.00131944
2L	2530887	A	G	-0.349874	0.0032813
2L	2530894	G	C	-0.38097	0.00366144
2L	2545607	T	C	-0.335736	0.00331764
2L	2557727	C	G	-0.279435	0.00333253
2L	2591671	C	T	0.466452	0.00222475
2L	2592732	T	A	-0.28867	0.00200767
2L	2593002	A	G	-0.46493	0.00273197
2L	2593048	G	A	-0.446811	0.00220089
2L	2599206	T	A	-0.335533	0.00350427
2L	2600192	A	C	0.386684	0.00355192
2L	2613264	A	T	0.316384	0.0017448
2L	2624586	C	T	0.332645	0.0019723
2L	2641827	A	G	0.40108	8.83236e-05
2L	2643387	T	C	-0.402254	0.000181291
2L	2647811	T	A	0.36374	0.000115161
2L	2648406	A	T	-0.287443	0.00295931
2L	2648602	C	T	-0.407858	0.000570143
2L	2664342	C	A	-0.334307	0.00262644
2L	2681950	C	A	-0.357547	0.00141987
2L	2684662	G	A	-0.397993	0.00237226
2L	2685443	C	T	0.327642	0.000795789
2L	2690762	A	C	-0.282082	0.00380913
2L	2692341	G	A	0.351145	0.00361533
2L	2717641	C	G	0.466698	0.00230796
2L	2728176	A	G	-0.423671	0.00070858
2L	2759192	T	C	-0.311787	0.00354587
2L	2759198	C	T	-0.529872	0.00361869
2L	2759921	T	C	-0.282789	0.00314728
2L	2760306	G	A	-0.327369	0.00249708
2L	2791977	A	T	-0.320737	0.000738381
2L	2795463	A	C	0.321924	0.00108357
2L	2796784	G	A	-0.361223	0.000632098
2L	2800827	T	C	0.314542	0.00152291
2L	2800829	T	C	0.368174	0.000904442
2L	2808339	A	T	-0.291602	0.0033458
2L	2810673	C	T	-0.304992	0.00209162
2L	2812345	C	T	-0.294378	0.0031031
2L	2812349	A	G	-0.300745	0.0026163
2L	2813377	G	C	-0.393187	0.00124383
2L	2815576	A	T	0.376111	7.35318e-05
2L	2815582	G	A	0.307592	0.0013826
2L	2829860	C	T	0.400691	0.00108302
2L	2844688	T	C	-0.312591	0.00272817
2L	2845338	A	T	-0.342676	0.00112312
2L	2855393	C	T	0.386223	0.000664485
2L	2856742	A	G	-0.300143	0.00259491
2L	2858872	T	G	0.287282	0.00266095
2L	2862053	T	C	-0.263411	0.00365049
2L	2880788	G	T	0.322859	0.00220817
2L	2883195	A	T	-0.460593	0.00127542
2L	2885696	A	C	-0.310968	0.000988433
2L	2888070	G	C	-0.260579	0.00344125
2L	2926102	A	T	0.281204	0.00352213
2L	2950014	C	T	-0.463861	6.73076e-05
2L	2951455	G	C	-0.354935	0.00372835
2L	2981704	C	G	0.502534	0.00323204
2L	2990630	A	T	0.313566	0.00201266
2L	2992752	G	A	0.396006	0.000209927
2L	2992774	G	A	0.332593	0.00174606
2L	3071272	C	T	0.393459	0.0012991
2L	3072405	A	T	0.434782	0.00265231
2L	3094252	C	A	-0.301626	0.00333137
2L	3120752	C	A	0.348064	0.00244926
2L	3121492	A	C	-0.461897	0.000307218
2L	3123499	T	C	-0.28609	0.00151313
2L	3128505	C	A	-0.327692	0.00210562
2L	3128582	A	T	0.406595	0.00282815
2L	3131813	C	T	0.340878	0.000898573
2L	3137361	A	G	-0.305732	0.00241922
2L	3139449	T	C	0.297042	0.00142719
2L	3147990	A	T	-0.517369	9.82093e-05
2L	3166534	T	A	-0.406132	0.000991078
2L	3174698	G	A	0.360005	0.000227664
2L	3174733	G	A	0.48976	0.000398455
2L	3176035	T	C	0.324868	0.00296327
2L	3176106	A	G	0.473509	1.29616e-05
2L	3176107	G	T	0.460844	2.98049e-05
2L	3178260	T	C	0.29256	0.00155664
2L	3179954	A	G	-0.333767	0.00195424
2L	3185279	G	C	-0.38278	0.0010959
2L	3185348	G	T	-0.450832	9.55289e-05
2L	3199591	T	C	0.464242	0.00180855
2L	3214284	T	G	-0.391159	0.00315662
2L	3216719	C	G	-0.329493	0.00130034
2L	3218391	A	T	-0.304815	0.00190862
2L	3223597	T	C	-0.331542	0.000553731
2L	3223606	A	G	-0.355175	0.000226581
2L	3223608	G	T	-0.358136	0.000688819
2L	3223611	T	C	-0.381604	7.52291e-05
2L	322793	A	T	0.373786	0.000165028
2L	3246778	T	G	0.463844	0.000427599
2L	3246784	T	C	0.403892	0.00221011
2L	3248791	G	C	-0.313747	0.00164891
2L	3260213	T	G	-0.302006	0.00281783
2L	3269362	G	C	-0.287802	0.00310452
2L	3270879	G	C	-0.286845	0.00208466
2L	3271683	C	A	-0.328448	0.000361212
2L	3277518	T	G	-0.275361	0.00233885
2L	3278004	T	C	-0.433973	0.00224391
2L	3281025	G	A	-0.324362	0.000616579
2L	3281746	T	G	-0.339814	0.000661372
2L	3289089	A	T	-0.294693	0.0020389
2L	3300286	G	C	-0.288563	0.00130313
2L	3302429	G	A	-0.347278	0.000526084
2L	3319909	C	T	-0.366075	0.000841855
2L	3319939	T	C	-0.433115	0.00383304
2L	3323695	C	T	-0.305862	0.000968483
2L	3327435	G	A	-0.408123	0.00146434
2L	3335937	C	T	0.399363	0.00284673
2L	3339431	C	G	-0.345256	0.00179085
2L	3370977	C	T	-0.31561	0.000680993
2L	3373829	T	C	-0.289702	0.00195598
2L	3374079	A	G	-0.389093	0.000126416
2L	3374552	C	T	-0.412795	0.00199268
2L	3375686	A	T	0.434265	0.00114043
2L	3377159	T	A	-0.304792	0.00260439
2L	3377162	G	A	-0.312055	0.00166277
2L	3377523	C	T	0.459333	0.000255291
2L	3387045	G	C	-0.417242	0.00010499
2L	3387446	T	G	-0.335426	0.000384235
2L	3388438	C	G	0.361099	0.000279431
2L	3390763	T	C	0.284423	0.00296839
2L	3391822	A	G	0.301096	0.0014206
2L	3404166	T	A	0.342812	0.000267345
2L	3407427	T	C	-0.335615	0.00120172
2L	3409448	C	A	-0.379599	0.000700341
2L	3409656	T	A	-0.298372	0.00174903
2L	3419728	G	T	-0.319192	0.00312062
2L	3421694	C	T	-0.34154	0.00222687
2L	3421702	T	C	-0.338386	0.00280122
2L	3425068	A	T	0.332072	0.000526766
2L	3425201	A	G	-0.276538	0.00203506
2L	3428019	G	T	-0.429337	0.00339679
2L	3439080	T	C	-0.33585	0.00356618
2L	3449530	T	A	-0.325986	0.000538764
2L	3449544	A	G	-0.300421	0.00160958
2L	3458447	C	T	-0.314618	0.00334325
2L	3464086	C	T	-0.43766	0.00196885
2L	3472919	T	A	0.311474	0.00294852
2L	3478046	G	C	-0.304516	0.00353248
2L	3516703	C	G	-0.322281	0.00160012
2L	3516831	T	C	-0.338963	0.00322106
2L	3518387	G	A	0.375455	0.00239973
2L	3519146	A	G	0.343051	0.00189342
2L	3519167	A	G	0.332536	0.00250066
2L	3524128	T	G	-0.345423	0.000152951
2L	3524134	A	C	0.421081	0.00172959
2L	3535178	T	G	-0.337234	0.00143649
2L	3535389	G	A	-0.315107	0.00219359
2L	3551212	T	G	0.305969	0.00152644
2L	3558969	C	T	-0.43789	0.00238775
2L	3566210	A	G	0.350495	0.00239389
2L	3569570	G	T	-0.344528	0.000766909
2L	3598741	C	T	0.397401	0.000166603
2L	3619140	T	C	0.523765	0.00229284
2L	3620405	C	A	0.277164	0.00363258
2L	3620670	C	A	0.299231	0.00147278
2L	3623271	A	G	-0.311651	0.00212161
2L	3631296	A	T	0.266264	0.00341757
2L	3635021	G	A	0.309019	0.0031566
2L	3635031	C	T	0.336716	0.00135283
2L	3636529	T	C	0.480879	0.00257526
2L	3647806	A	T	-0.295506	0.00108934
2L	3647807	A	C	-0.291475	0.00127217
2L	3655239	A	G	-0.327511	0.00325177
2L	3665481	T	A	-0.293925	0.00303052
2L	3667387	A	C	-0.302142	0.00350489
2L	3672346	A	C	0.332619	0.000344765
2L	3688658	G	C	-0.307473	0.00331559
2L	3693285	T	C	-0.282884	0.00261213
2L	3699109	C	T	0.401893	0.000214579
2L	3699142	T	C	0.433665	0.000103755
2L	3702896	T	C	-0.290175	0.00124644
2L	3714072	A	C	-0.309211	0.00149672
2L	3763886	T	C	0.314652	0.00268413
2L	3779357	T	C	0.314782	0.00191489
2L	3781715	T	C	-0.311978	0.00184024
2L	3784642	G	C	-0.312847	0.00187705
2L	3787330	C	T	-0.383156	0.00380194
2L	3788988	A	T	0.336901	0.00103928
2L	3791481	C	A	-0.298537	0.00373291
2L	3800020	C	T	0.387406	0.000931643
2L	3815975	T	C	0.477745	6.97979e-05
2L	3817718	G	A	0.315417	0.00182997
2L	3821018	T	G	0.468702	0.000369321
2L	384360	C	T	0.416983	0.000342766
2L	3854804	T	G	-0.31747	0.00264157
2L	3862574	A	G	0.35995	0.00188676
2L	3865174	T	C	0.41036	0.000937046
2L	3865445	A	T	0.373966	0.000962906
2L	3866203	T	C	-0.456056	5.06066e-05
2L	3868050	C	G	-0.309593	0.00142071
2L	3875814	G	A	-0.356213	0.000788738
2L	3879098	C	A	0.30505	0.00254636
2L	3880270	T	C	0.278688	0.00353043
2L	3894466	T	C	-0.504411	0.000100613
2L	3894470	A	T	-0.530029	0.000107388
2L	3894497	T	G	-0.407885	0.000172168
2L	3919358	G	A	-0.331067	0.00262011
2L	3941419	A	G	0.305891	0.00262412
2L	3945134	T	A	-0.338144	0.00102603
2L	3945150	A	T	-0.348663	0.00108103
2L	3945155	G	A	-0.334288	0.00167845
2L	3945227	A	G	-0.336139	0.000493758
2L	3945867	C	G	0.274766	0.00270303
2L	3962837	C	A	-0.331736	0.00299852
2L	3968711	T	C	-0.282526	0.00264215
2L	3970283	A	T	-0.36342	0.00173987
2L	399172	C	T	-0.336288	0.00190831
2L	3998757	G	A	0.315805	0.00328525
2L	3999417	C	A	0.347845	0.00185944
2L	4003024	A	G	-0.310361	0.00124103
2L	4004677	G	C	0.3293	0.00101784
2L	4004710	T	G	0.332764	0.000573536
2L	4019250	T	C	-0.42451	0.00327674
2L	4040959	A	G	0.316454	0.00139887
2L	4040968	G	C	0.276239	0.00233279
2L	4049740	T	C	-0.325655	0.00157476
2L	4058278	C	G	-0.445782	0.000136932
2L	4061915	A	T	-0.324727	0.000551984
2L	4064624	A	C	-0.291478	0.00227399
2L	4077502	G	T	0.396292	0.000169256
2L	4084360	T	C	0.351565	0.000287653
2L	4092822	A	C	0.282811	0.00270291
2L	4097421	G	A	-0.317938	0.000928311
2L	4107841	A	G	-0.367132	0.000143616
2L	4107846	T	A	-0.390737	4.38202e-05
2L	4108038	A	C	-0.324244	0.000461024
2L	4108040	T	G	-0.312436	0.000783794
2L	4125503	G	A	0.427758	9.67611e-05
2L	4132030	T	C	-0.306211	0.00362809
2L	413527	G	T	0.30838	0.00150761
2L	4141504	G	T	-0.374584	0.00376507
2L	4143164	C	A	-0.351011	0.000407346
2L	4162657	A	G	0.302751	0.00131165
2L	4162732	C	G	-0.297117	0.00228653
2L	4164035	A	C	-0.284916	0.00157261
2L	4184845	G	A	0.393045	0.00344857
2L	4186779	C	T	-0.344623	0.00057487
2L	4186856	C	T	-0.308191	0.0031802
2L	4191268	T	G	-0.515435	0.00388552
2L	4193529	A	G	-0.313515	0.00345957
2L	4193558	T	C	-0.317504	0.000929923
2L	4193603	G	C	-0.292504	0.00193959
2L	4195286	G	T	-0.303473	0.0011941
2L	4195288	C	T	-0.292513	0.00177911
2L	4208195	T	C	-0.389858	0.0033546
2L	4209577	T	C	-0.361159	0.000588142
2L	4210865	G	A	-0.451159	0.00236937
2L	4210867	G	A	-0.299877	0.0010736
2L	4216441	A	G	0.372754	0.00127644
2L	4222254	G	T	0.284882	0.00148002
2L	4228702	C	T	0.290263	0.00315977
2L	4250045	T	C	-0.426598	0.00294454
2L	4255201	A	T	-0.295941	0.00219007
2L	4259858	G	A	-0.387821	0.00248383
2L	4267756	C	T	0.305225	0.00336458
2L	4268645	C	T	0.370369	0.00128782
2L	4274283	C	G	-0.396667	0.000348526
2L	4274284	T	C	-0.375067	0.000724195
2L	4277174	C	T	-0.449887	0.00220696
2L	4286403	T	G	-0.412465	7.12281e-05
2L	4286407	T	C	-0.411419	7.14571e-05
2L	4290443	T	C	-0.311865	0.00216732
2L	4291294	C	T	-0.459538	0.000525318
2L	4305971	T	C	0.326053	0.00117544
2L	4307167	C	G	-0.301813	0.00211333
2L	431795	T	G	0.32079	0.0020326
2L	4324409	A	C	-0.293005	0.00258211
2L	4342070	T	C	-0.339127	0.0015467
2L	4344192	G	T	-0.305543	0.00377432
2L	4344298	A	C	-0.318494	0.000661915
2L	4345609	G	T	-0.307018	0.00242741
2L	4348543	A	C	-0.382384	0.000339949
2L	4352363	A	T	-0.322066	0.000679179
2L	4359013	A	G	0.340952	0.00122577
2L	4366833	A	G	-0.417843	0.000339869
2L	4370218	C	G	-0.295642	0.00360528
2L	4372049	G	T	-0.567986	5.0837e-05
2L	4382305	T	G	-0.398662	0.000549661
2L	4397963	A	C	-0.35206	0.000536884
2L	4398216	G	C	-0.286985	0.00291157
2L	4402695	C	T	-0.577776	4.24084e-05
2L	4402921	C	T	-0.415848	0.000499115
2L	4412474	C	A	-0.30229	0.00383904
2L	4416374	T	A	-0.275746	0.00262716
2L	4416388	G	A	-0.33045	0.000425648
2L	4416389	G	A	-0.338378	0.000513725
2L	4419559	G	A	0.309213	0.00375423
2L	4428693	G	C	-0.399945	0.00296363
2L	4432924	T	G	0.315038	0.00164769
2L	4432925	C	A	0.307926	0.00233661
2L	4444449	C	T	0.319038	0.00171347
2L	4450095	A	G	-0.326264	0.00335312
2L	4450736	G	C	0.624289	8.02458e-05
2L	4451466	C	A	0.358841	0.00347656
2L	4459472	G	T	0.383699	0.00332575
2L	4468787	A	G	-0.331504	0.000771289
2L	4512057	T	C	0.307761	0.00276642
2L	4525977	A	G	-0.335869	0.00124364
2L	4560064	T	G	-0.348359	0.00158979
2L	4560127	A	G	-0.319965	0.0021753
2L	4576920	C	T	-0.445209	0.00123675
2L	4593126	A	G	-0.291584	0.00150043
2L	4593570	C	T	-0.32789	0.00324811
2L	4596801	G	A	0.310276	0.0032663
2L	4599995	A	G	0.431685	8.76496e-05
2L	4611903	G	A	-0.395767	0.00173693
2L	4640005	T	C	-0.300766	0.00152566
2L	4646879	T	A	-0.515269	0.00106576
2L	4646882	A	C	-0.505888	0.00149604
2L	4646887	T	A	-0.545512	0.000607665
2L	4646892	T	C	-0.557697	0.000384118
2L	4646896	A	C	-0.52504	0.000702245
2L	4646909	C	T	0.30852	0.00153731
2L	4646915	T	G	0.325748	0.000817431
2L	4649585	T	A	-0.450681	0.000143862
2L	4651438	G	A	0.477954	0.000249026
2L	4690817	C	T	0.507506	0.000274137
2L	4705859	G	T	-0.312948	0.0035613
2L	4719449	T	C	-0.542796	0.000507213
2L	4725686	A	G	0.609744	0.000263925
2L	4726968	G	A	0.375867	0.00136666
2L	4728511	T	C	-0.404484	0.000154587
2L	4732471	A	G	-0.462213	0.00168819
2L	4732476	T	A	-0.535803	0.00039984
2L	4747506	A	G	-0.310742	0.00234687
2L	4748858	A	C	0.271139	0.00304883
2L	474943	T	A	-0.369077	0.00380036
2L	4751586	C	T	-0.282001	0.00313786
2L	4763338	C	A	-0.327472	0.000532942
2L	4768115	C	A	0.29146	0.00250168
2L	4776877	G	C	-0.350728	0.00367438
2L	4787679	T	A	-0.329492	0.000457516
2L	4787694	T	A	-0.283867	0.00260723
2L	4809944	T	C	-0.460526	0.00100975
2L	4810183	A	C	0.350531	0.0021748
2L	4837231	A	T	-0.324304	0.00129003
2L	4837243	G	C	-0.427537	2.66229e-05
2L	484284	T	C	-0.328366	0.00227199
2L	4855995	A	G	0.321684	0.00290123
2L	4856822	G	A	-0.322849	0.000503511
2L	4861558	G	A	-0.310002	0.00340538
2L	4861812	A	G	0.312808	0.000912637
2L	4862372	G	A	0.327601	0.00346114
2L	4863638	T	C	0.303698	0.00208105
2L	4872597	C	T	-0.351246	0.0010069
2L	4874031	C	T	0.387732	3.07925e-05
2L	4880952	C	T	-0.289129	0.00262156
2L	4881058	C	T	0.281077	0.00308826
2L	4881841	G	A	0.306967	0.00334527
2L	4883499	T	C	-0.326836	0.0013428
2L	4886659	A	T	-0.301186	0.00128383
2L	4894233	C	T	0.509702	0.00150139
2L	4896499	G	T	0.447145	0.0001472
2L	4897839	A	T	-0.276347	0.003614
2L	4901550	T	C	-0.338141	0.00101949
2L	4901781	T	C	-0.363756	0.00128225
2L	4903477	C	T	-0.434466	0.000903075
2L	4905518	A	G	0.315307	0.00379769
2L	4907016	A	G	-0.408869	0.000265925
2L	4913404	G	A	-0.297127	0.00328729
2L	4915599	G	A	-0.330245	0.00186598
2L	4942508	A	G	0.378175	0.00220685
2L	4945116	T	A	0.391132	0.00232232
2L	4960215	C	T	-0.361602	0.00112864
2L	497379	G	C	-0.340746	0.00364145
2L	498144	G	T	-0.383868	0.000107744
2L	498252	C	T	-0.373065	0.000110767
2L	498259	A	G	-0.340633	0.000214106
2L	4982845	C	T	-0.348245	0.00190942
2L	4985267	T	C	0.384518	0.00107247
2L	4990409	A	T	-0.290667	0.00192605
2L	500906	A	G	-0.292939	0.00219747
2L	5012467	T	G	-0.287773	0.00271292
2L	5014150	C	T	-0.403928	0.000684396
2L	5026773	A	G	0.428729	0.000989567
2L	5043448	G	T	0.347675	0.00114641
2L	5056615	T	A	-0.282643	0.00319615
2L	5068788	G	A	-0.340302	0.00050112
2L	5088847	G	T	0.41129	0.000515213
2L	5094141	C	A	-0.340322	0.000729724
2L	5103745	T	C	-0.283288	0.00263938
2L	5109943	G	T	-0.32321	0.0021502
2L	5110663	T	C	-0.416537	0.000165273
2L	5115211	C	T	-0.298351	0.00136412
2L	5126118	T	A	-0.302575	0.00218544
2L	5136585	A	G	-0.296185	0.00389322
2L	5139748	T	A	-0.43978	0.00134457
2L	5141646	T	A	0.28185	0.0018679
2L	5159134	G	C	-0.392892	0.000244463
2L	5159249	A	G	-0.324799	0.00302157
2L	5161295	A	G	0.274121	0.00224544
2L	5161385	G	T	-0.310882	0.000743208
2L	5161395	C	T	-0.324041	0.000453211
2L	5161436	A	G	-0.31991	0.0011036
2L	5161506	C	A	0.400819	4.80316e-05
2L	5161976	T	C	-0.258994	0.00342667
2L	5162021	T	C	0.258771	0.00349777
2L	5192166	C	A	-0.413845	0.0026041
2L	5192177	G	T	-0.425767	0.00224187
2L	5215177	A	C	-0.342871	0.00262446
2L	5215451	G	A	0.303141	0.00140598
2L	5215476	C	T	0.301593	0.00125608
2L	5220293	C	T	0.593407	0.000114061
2L	5249270	T	A	0.309356	0.00124234
2L	5267791	A	T	0.414498	0.00198084
2L	5271645	T	G	0.287304	0.00201729
2L	5276708	G	A	-0.33851	0.000874115
2L	5276745	A	T	-0.444662	0.00348759
2L	5285798	A	G	-0.371358	0.000204272
2L	529157	T	C	-0.270121	0.00341146
2L	529444	G	A	-0.259291	0.00376789
2L	5303814	A	C	-0.396054	0.0037199
2L	5307830	C	T	-0.352801	0.00263381
2L	5329227	C	G	-0.284272	0.00248286
2L	5330567	A	G	-0.298046	0.00340843
2L	5364734	G	A	-0.310677	0.00364236
2L	5371157	T	A	-0.457792	6.76251e-06
2L	5371159	T	C	-0.422486	3.1685e-05
2L	5371183	A	T	-0.429247	2.41821e-05
2L	5371237	A	T	-0.317485	0.00253571
2L	5371238	A	T	-0.331456	0.00170941
2L	5371295	T	A	-0.344823	0.000556416
2L	5371917	G	C	-0.28156	0.00333954
2L	5371939	G	C	-0.291237	0.00342474
2L	5392511	A	G	-0.298845	0.00255551
2L	539513	C	T	-0.306809	0.00234895
2L	5433133	T	G	-0.382523	0.00289157
2L	5438584	A	G	-0.277066	0.00343993
2L	5445952	C	T	0.497045	0.000357065
2L	5446106	T	A	0.505081	0.000560973
2L	5446128	T	A	0.550436	0.000230876
2L	5446131	T	C	0.497747	0.000690177
2L	5454326	T	G	0.380117	0.002059
2L	5457168	C	T	0.323553	0.00183147
2L	5465531	G	A	0.336041	0.00096805
2L	5484928	T	A	-0.438339	0.000413887
2L	5484932	T	C	-0.511071	0.000135918
2L	5486464	A	C	0.305868	0.00149393
2L	550165	A	G	0.351241	0.00180054
2L	5514261	A	C	-0.304228	0.00272305
2L	5515625	C	T	0.410401	0.00230756
2L	5517607	T	G	-0.294115	0.00181974
2L	5517653	C	T	-0.295997	0.00139627
2L	5517712	G	A	-0.364664	5.69453e-05
2L	5517735	C	A	-0.315023	0.000520457
2L	5517740	T	G	-0.321223	0.00041182
2L	5518340	T	C	-0.352817	0.00132851
2L	5518974	G	A	-0.430838	0.000910663
2L	5566112	C	G	0.378409	0.0015084
2L	5566114	A	G	0.366391	0.00202757
2L	557908	A	C	0.282797	0.00320231
2L	557931	A	G	0.303383	0.00161619
2L	558247	G	A	0.287958	0.00299864
2L	558527	T	C	0.358293	0.000242318
2L	558545	C	A	0.338932	0.000437717
2L	5585454	A	T	-0.513412	0.00210213
2L	558932	T	C	0.277272	0.0018676
2L	558966	A	C	0.294335	0.000995787
2L	5590314	T	C	-0.29115	0.00330792
2L	559204	G	T	0.296066	0.000757989
2L	559242	C	T	0.29137	0.000990032
2L	5600661	A	G	0.367172	0.00351439
2L	5608558	C	T	-0.554303	0.000487896
2L	561396	T	C	0.359291	0.00143866
2L	5614896	G	A	-0.279987	0.0032918
2L	5622701	C	G	0.32137	0.000931761
2L	5627776	T	C	0.463501	0.000175772
2L	5631208	A	G	-0.344613	0.000886675
2L	5636363	C	T	0.387536	0.00264977
2L	5641637	A	G	-0.328301	0.000482426
2L	564704	G	A	-0.348051	0.00225109
2L	5654155	T	C	-0.418635	0.0035599
2L	5654170	C	A	-0.435486	0.00227967
2L	5672368	A	C	-0.369884	0.00154157
2L	5684269	A	T	0.456724	0.000412157
2L	5694191	C	T	-0.319319	0.00219682
2L	5694212	A	T	-0.324211	0.00178507
2L	5698686	A	G	-0.358807	0.00218493
2L	5703015	C	A	0.347391	0.000788551
2L	5703032	T	C	0.389511	9.80113e-05
2L	5703066	C	A	0.411772	0.000383852
2L	570439	G	A	-0.298064	0.0029245
2L	570607	A	G	0.43623	0.000181763
2L	570673	C	G	0.45742	4.07927e-05
2L	570919	A	G	0.428289	2.16563e-05
2L	570925	G	T	0.411666	6.82678e-05
2L	5711478	C	T	0.335946	0.00343294
2L	5711483	A	C	0.357487	0.0018571
2L	571318	C	T	0.28956	0.00278662
2L	571438	A	G	0.394888	5.06524e-05
2L	571450	T	C	0.366157	0.00015196
2L	573376	G	T	-0.396736	0.00191975
2L	5736713	A	G	0.490291	4.11231e-05
2L	5743742	T	A	-0.31887	0.0018683
2L	5769702	A	G	0.360362	0.00279402
2L	5769718	T	G	0.431933	0.00157169
2L	5788363	C	T	-0.363419	0.00217643
2L	5809188	A	T	0.272864	0.0037843
2L	5841028	C	T	-0.359378	0.00233271
2L	5844484	C	A	0.394308	0.00124061
2L	5851246	G	A	-0.44647	0.00388724
2L	5858993	G	A	-0.328312	0.00256422
2L	5873382	G	A	0.387044	0.0027842
2L	5900552	G	T	0.400895	0.00139268
2L	5906774	G	T	0.372679	0.000164
2L	5933549	A	G	0.399211	0.000289744
2L	5949327	A	C	0.3414	0.000509035
2L	5955285	C	A	0.344676	0.000304004
2L	5968017	C	T	0.302035	0.00348749
2L	5968490	T	A	-0.292931	0.00291784
2L	5981444	G	T	-0.286523	0.00224935
2L	6012424	C	A	0.316914	0.00354999
2L	6013420	C	T	0.331187	0.00297604
2L	6034807	T	C	-0.31038	0.00297402
2L	6039104	T	C	-0.479129	0.000695646
2L	6041174	C	T	-0.344498	0.000398533
2L	6041207	A	G	-0.345692	0.000311221
2L	6042982	C	T	-0.416092	0.000973132
2L	6043984	T	C	-0.343717	0.00151968
2L	6044714	C	G	-0.35177	0.00262065
2L	6045267	C	T	-0.394684	0.00214232
2L	6046277	A	G	-0.339888	0.00296258
2L	6050517	A	T	-0.368493	0.00173723
2L	6050834	G	A	-0.295318	0.00109397
2L	6051067	G	T	0.62668	0.000578024
2L	6089903	T	G	0.36386	0.0035247
2L	6089904	G	T	0.369482	0.0031131
2L	6093032	C	T	-0.400079	0.000204376
2L	6095472	T	C	-0.379095	0.000832142
2L	6098441	A	C	-0.384555	0.00206403
2L	6098989	G	A	-0.496183	0.00337362
2L	6102203	C	G	-0.294885	0.00285443
2L	6103071	C	G	-0.439957	0.0015804
2L	6105778	T	A	-0.384499	0.00085418
2L	6108235	T	C	0.278584	0.0028774
2L	6111483	T	G	0.316443	0.000775932
2L	6116050	T	G	-0.408046	0.00112492
2L	6116142	A	C	0.279437	0.00311947
2L	6116712	T	C	0.335777	0.00282612
2L	6120525	A	T	-0.291197	0.00271631
2L	6133756	A	C	-0.2714	0.00357013
2L	6139466	A	G	-0.325529	0.000666804
2L	614453	T	A	0.319758	0.00106894
2L	614456	C	T	0.30863	0.00154593
2L	6174068	T	C	0.333426	0.00312351
2L	6174069	G	T	0.329777	0.0036041
2L	617466	T	G	-0.305482	0.00222101
2L	617477	A	G	-0.31826	0.00194697
2L	617479	T	C	-0.306965	0.00290151
2L	6186927	T	C	-0.36349	0.000502135
2L	6192242	G	C	0.483128	0.000658087
2L	6195716	C	T	0.383101	0.000188399
2L	6209028	T	G	-0.298861	0.00116519
2L	6209041	T	C	-0.30245	0.00110435
2L	6209066	T	C	-0.324534	0.00113391
2L	6223240	T	C	0.291585	0.00204567
2L	6223255	G	T	0.333321	0.00036538
2L	6230013	A	G	0.280113	0.00356824
2L	6244828	A	G	-0.283829	0.00319085
2L	6280679	G	C	0.442262	0.00111512
2L	629032	C	T	-0.300733	0.00122367
2L	6301806	G	A	-0.34297	0.000858981
2L	6307282	G	A	-0.357785	0.000686581
2L	6332640	T	C	0.384411	0.00192868
2L	633769	C	G	-0.309575	0.00338681
2L	6345263	A	G	-0.365604	0.000296461
2L	6345276	C	T	-0.345587	0.000569699
2L	6345356	G	A	-0.324524	0.00070617
2L	6345395	T	G	-0.287494	0.00363532
2L	6345494	G	A	-0.368725	0.000248192
2L	634578	T	C	0.461114	0.00112857
2L	6348819	A	T	0.492646	0.00101794
2L	6348822	A	C	0.433278	0.00374319
2L	6351806	T	G	-0.278738	0.00189879
2L	6351830	T	A	0.363772	0.000589625
2L	6359939	C	G	-0.387137	0.000175199
2L	6377499	A	T	0.27873	0.00326147
2L	6388721	C	A	0.297512	0.00181975
2L	6404037	A	G	-0.526257	0.00149315
2L	6406720	C	T	-0.314176	0.00367285
2L	6422740	A	C	-0.380796	0.00216264
2L	6445440	A	G	-0.303318	0.00367211
2L	6445478	A	G	-0.33732	0.000769107
2L	6445512	T	C	-0.363066	0.000378936
2L	6452073	A	G	-0.29645	0.00288117
2L	6458889	T	A	-0.363109	0.00267257
2L	6458890	T	A	-0.388038	0.00141526
2L	6465389	C	T	-0.362432	0.000180172
2L	6479657	T	A	-0.30505	0.00216448
2L	647994	A	G	-0.344373	0.00029349
2L	6531794	A	C	0.295315	0.00234325
2L	653359	A	G	0.387847	0.000409715
2L	6536385	A	T	0.495832	4.60465e-05
2L	6551505	G	C	-0.340701	0.0025118
2L	6553135	A	G	-0.359128	0.00114317
2L	6563524	C	A	0.435699	0.00114135
2L	657453	C	T	-0.402468	0.000721984
2L	657457	A	T	-0.382961	0.00142715
2L	6581456	A	G	-0.369122	0.00387562
2L	6583684	A	G	0.299612	0.00136377
2L	6583688	G	T	-0.285972	0.00226833
2L	6605815	T	G	-0.276205	0.00307676
2L	6611697	T	G	-0.32088	0.00364373
2L	6655514	T	C	-0.41266	0.00035344
2L	6675884	A	G	-0.525298	0.00330574
2L	6676193	T	A	-0.348408	0.000823844
2L	6677825	A	G	-0.300416	0.00325109
2L	6685850	G	T	-0.312145	0.000995872
2L	6700382	G	A	-0.425723	0.00319398
2L	6726555	C	A	-0.323614	0.00370436
2L	6726559	C	A	-0.340406	0.00199032
2L	6728546	A	G	-0.440649	0.000944732
2L	6728549	G	A	-0.506115	0.000171121
2L	6730378	A	T	-0.280084	0.0029056
2L	6751677	G	C	-0.285105	0.00343068
2L	6764389	C	T	-0.285061	0.00302232
2L	6764471	A	T	-0.373852	0.000109421
2L	6764480	T	A	-0.306137	0.00191064
2L	6764482	T	G	-0.318072	0.0011957
2L	6777004	C	T	0.395747	0.00104059
2L	6796560	A	G	-0.318182	0.00228974
2L	6799304	G	T	-0.346159	0.00209101
2L	6802717	T	C	-0.293653	0.00306931
2L	6818101	G	C	0.273233	0.00233886
2L	6822875	T	C	-0.309869	0.00303676
2L	6832449	C	T	0.389731	0.000284329
2L	6835237	G	T	-0.303395	0.00162884
2L	6851652	C	T	-0.778208	1.69796e-05
2L	6853450	C	T	0.326067	0.00213246
2L	6856922	C	T	0.3776	0.000513113
2L	6860969	G	T	-0.350936	0.000649917
2L	6867885	C	T	0.30978	0.00215776
2L	6867886	A	T	0.294832	0.00331763
2L	6876444	G	T	0.317347	0.00113938
2L	6915854	A	G	-0.300983	0.00221748
2L	6933772	A	G	-0.376258	0.000538574
2L	6934017	G	A	-0.400223	0.00232133
2L	6936728	G	A	0.312108	0.00371271
2L	6948917	T	G	-0.302957	0.00258881
2L	6972051	T	G	-0.396417	0.00190396
2L	6972072	A	G	-0.455639	0.000341609
2L	6982028	G	C	-0.491462	5.10646e-06
2L	6983678	T	G	-0.313009	0.00309011
2L	6983954	A	G	0.29776	0.00340629
2L	6987417	T	C	-0.284427	0.002351
2L	6987547	T	A	0.295062	0.00250155
2L	6990030	T	G	-0.380338	0.00222884
2L	6999623	T	C	0.31997	0.00345062
2L	7027208	C	A	-0.350293	0.00180998
2L	7039731	T	A	-0.316937	0.00331387
2L	7068156	G	A	-0.396717	0.00101395
2L	7073972	A	G	-0.291437	0.00218158
2L	7076162	T	A	0.556865	9.85085e-06
2L	7085689	T	C	-0.344951	0.00125758
2L	7094571	A	C	0.352163	0.000189758
2L	7094655	G	C	0.279426	0.00275045
2L	710481	T	A	-0.318804	0.00362241
2L	7110764	A	C	-0.281902	0.00198819
2L	7110992	T	C	-0.354618	0.00160978
2L	711688	C	G	-0.384557	0.00239667
2L	7122930	G	A	0.352237	0.00140286
2L	7144990	G	C	-0.455503	0.000359618
2L	7155793	T	C	0.287482	0.00332969
2L	7156432	C	T	0.319047	0.00137931
2L	7157053	A	G	0.318672	0.00314643
2L	7174983	A	G	-0.370009	0.00265508
2L	7175869	A	G	0.297415	0.00153959
2L	7184360	C	T	-0.265037	0.00339933
2L	7186147	C	T	0.281458	0.00289293
2L	7186335	A	T	0.334458	0.00221154
2L	7188009	A	T	0.330309	0.0006341
2L	7189530	C	T	0.299524	0.00267597
2L	719581	C	A	-0.297695	0.00260769
2L	719584	A	T	-0.323577	0.0010585
2L	7197639	A	G	-0.391575	0.000952201
2L	7201220	C	T	-0.298211	0.00116004
2L	720190	A	G	-0.3279	0.00247373
2L	7203802	T	A	0.282716	0.00181758
2L	7204847	T	A	-0.368488	5.94371e-05
2L	7204854	T	A	-0.326102	0.000753543
2L	7211208	G	A	0.472307	0.000807914
2L	7211635	A	G	0.292211	0.00115064
2L	7211639	T	G	0.285377	0.00146623
2L	7213725	G	C	-0.32782	0.00387854
2L	7217437	A	T	0.339103	0.000411263
2L	7217979	C	T	-0.355636	0.000318675
2L	7218072	A	G	-0.30654	0.00103764
2L	7218835	G	A	-0.34795	0.0013323
2L	7222822	A	T	0.357832	0.00328199
2L	7228633	T	A	0.370873	0.00296839
2L	7239843	C	T	0.321861	0.00136028
2L	7240819	G	C	0.324573	0.00133771
2L	7263573	A	G	0.32633	0.00315151
2L	7270672	T	C	-0.307108	0.00212902
2L	7272742	G	T	-0.315977	0.00288862
2L	727658	A	G	-0.338567	0.000805041
2L	7299545	G	C	-0.354582	0.00249407
2L	730091	T	C	-0.355397	0.00245883
2L	730196	A	T	-0.372826	0.000859566
2L	7305374	T	C	0.326677	0.00106138
2L	7305404	T	C	-0.300057	0.00174162
2L	7310300	T	C	-0.311535	0.000759656
2L	7311064	A	T	-0.395326	0.0014944
2L	7318833	G	A	-0.38107	0.000559437
2L	7324737	G	T	0.300481	0.00263866
2L	7327839	A	T	0.322371	0.00119276
2L	733087	A	G	-0.34511	0.000267754
2L	7331549	C	T	-0.48935	0.00122388
2L	7331561	C	A	-0.462339	0.00119609
2L	7332385	G	A	-0.332084	0.00234529
2L	7333427	A	C	0.293199	0.00243069
2L	7336714	A	T	-0.406273	0.00109225
2L	7336832	T	G	-0.520577	1.33374e-05
2L	7351553	G	A	0.323412	0.00233846
2L	7354259	T	A	0.350766	0.00291004
2L	7364596	G	A	-0.35271	0.00279324
2L	7364610	A	G	-0.281231	0.00355139
2L	7372307	T	G	-0.293632	0.00263718
2L	7375103	T	C	0.412076	7.64522e-05
2L	7376482	T	C	-0.27975	0.00345164
2L	7378694	T	C	0.384566	0.000220363
2L	7378703	T	G	0.420169	7.40914e-05
2L	7381922	T	C	-0.42107	0.00256108
2L	7396607	C	A	-0.266616	0.00326613
2L	7396787	G	A	-0.282109	0.00367649
2L	7410643	A	T	-0.306149	0.00138039
2L	7417195	T	A	-0.301177	0.00262456
2L	7421476	G	T	-0.324578	0.00223328
[truncated: 5,748 more rows]

## Sheet: README
Table S1: Population information
Table S2: Top 1% of seasonal SNPs (regression beta and p-values). Coordinates are in D. melanogaster reference v5.5
